# Supplementary material for: Tumor elimination by clustered microRNAs miR-306 and miR-79 via noncanonical activation of JNK signaling
Source: eLife journal article supplement (doi:10.7554/elife.77340), 2022-10-12
Supplement: fig1-data1 [file Figure 1H.xls]

## Sheet: Sheet1
	A	B	C	D	E	F	G
#1	0.289765	0.220159	0.661326	0.649002	0.0925361	0.142336	0.10298
#2	0.291492	0.241675	0.7034	0.477798	0.09537	0.141388	0.165718
#3	0.286816	0.26099	0.708141	0.788039	0.239168	0.160137	0.174923
#4	0.302178	0.230576	0.514637	0.711872	0.227609	0.123352	0.142103
#5	0.307873	0.268758	0.694168	0.871905	0.127298	0.167794	0.139692
#6	0.31479	0.2444	0.593548	0.712906	0.116604	0.145591	0.0740133
#7	0.32972	0.303821	0.597321	0.609889	0.235956	0.064442	0.0995433
#8	0.211682	0.271834	0.805183	0.517206	0.108448	0.055365	0.0430353
#9	0.267617	0.330018	0.471164	0.73267	0.166159	0.029883	0.0882445
#10	0.251137	0.32242	0.380334	0.786154	0.372538	0.107438	0.11039
#11	0.301439	0.230011	0.654504	0.748556	0.178897	0.140667	0.0922714
#12	0.342591	0.306891	0.46204	0.562575	0.273559	0.167427	0.150296
#13	0.376149	0.355485	0.53692	0.881752	0.204706	0.26822	0.0703291
#14	0.317695	0.294637	0.484942	0.532748	0.113703	0.0793811	0.0370132
#15	0.257445		0.674538	0.814417	0.114994	0.157925	0.0536737
#16	0.306119		0.6831	0.744637	0.101806	0.195311	0.0911178
#17	0.305338		0.673673	0.594302	0.189825	0.0938526	0.0769821
#18			0.525666	0.549243	0.26985	0.181431	0.0715218
#19			0.616766	0.627863	0.302304	0.0687757	0.185257
#20			0.534781	0.587611	0.256257	0.138071	0.0796278
#21				0.531286	0.191432	0.125663	0.0754168
#22				0.736963	0.11518	0.188341	0.137513
#23				0.577551	0.246624	0.130154	0.0918284
#24				0.616063	0.173751	0.23827	0.124551
#25				0.626026	0.186717		0.0710249
#26				0.552959	0.160292		0.271509
#27				0.644716	0.187298
#28				0.530843	0.0645331
#29				0.645504	0.120187
#30				0.352098	0.0705202
#31				0.460897	0.14077
#32				0.659445	0.0969141
#33				0.52343	0.121118
#34				0.443018	0.18385
#35				0.485683	0.160394
#36				0.599004
#37				0.732572
#38				0.766229
#39				0.555847
#40				0.585383
#41				0.52487
#42				0.431683
