# Supplementary material for: Tumor elimination by clustered microRNAs miR-306 and miR-79 via noncanonical activation of JNK signaling
Source: eLife journal article supplement (doi:10.7554/elife.77340), 2022-10-12
Supplement: fig1-data1 [file Figure 1I.xls]

## Sheet: Sheet1
pupation rate		5 days	6 days	7 days	8 days	9 days	10 days	11 days	12 days
dlg[m52]+Ras[v12]+luc	group 1	0.0333333	0.266667	0.5	0.6	0.633333	0.633333	0.633333	0.633333
	group 2	0	0.1875	0.40625	0.5	0.625	0.65625	0.65625	0.65625
	group 3	0	0.266667	0.566667	0.733333	0.733333	0.733333	0.733333	0.733333
dlg[m52]+Ras[v12]+mir-306	group 1	0	0.225352	0.690141	0.887324	0.915493	0.943662	0.943662	0.943662
	group 2	0.027027	0.297297	0.540541	0.864865	0.891892	0.891892	0.891892	0.891892
	group 3	0	0.228571	0.514286	0.8	0.857143	0.857143	0.857143	0.857143
dlg[m52]+Ras[v12]+mir-79	group 1	0	0.27027	0.675676	0.891892	0.945946	0.945946	0.945946	0.945946
	group 2	0	0.3125	0.5625	0.78125	0.84375	0.84375	0.84375	0.84375
	group 3	0	0.277778	0.638889	0.833333	0.944444	0.944444	0.944444	0.944444
