# Supplementary material for: Tumor elimination by clustered microRNAs miR-306 and miR-79 via noncanonical activation of JNK signaling
Source: eLife journal article supplement (doi:10.7554/elife.77340), 2022-10-12
Supplement: fig1-data1 [file Figure 1J.xls]

## Sheet: Sheet1
		eclosion rate
group 1	dlg[m52]+Ras[v12]+luc	0
	dlg[m52]+Ras[v12]+mir-306	0.028169
	dlg[m52]+Ras[v12]+mir-79	0.027027
group 2	dlg[m52]+Ras[v12]+luc	0
	dlg[m52]+Ras[v12]+mir-306	0.027027
	dlg[m52]+Ras[v12]+mir-79	0.03125
group 3	dlg[m52]+Ras[v12]+luc	0
	dlg[m52]+Ras[v12]+mir-306	0.0571429
	dlg[m52]+Ras[v12]+mir-79	0
