# Supplementary material for: Tumor elimination by clustered microRNAs miR-306 and miR-79 via noncanonical activation of JNK signaling
Source: eLife journal article supplement (doi:10.7554/elife.77340), 2022-10-12
Supplement: fig1-data1 [file Figure 1Q.xls]

## Sheet: Sheet1
	M	N	O	P
#1	0.374588	0.296649	0.271954	0.234038
#2	0.356657	0.299276	0.287549	0.270108
#3	0.387939	0.281317	0.277931	0.248926
#4	0.427481	0.244771	0.297138	0.240896
#5	0.355947	0.190442	0.326981	0.201025
#6	0.341873	0.297126	0.259888	0.23411
#7	0.27967	0.308691	0.307734	0.239231
#8	0.293217	0.305378	0.300398	0.284644
#9	0.256014	0.310981	0.363608	0.272894
#10	0.269987	0.276275	0.259646	0.304857
#11	0.453171	0.306779	0.210085	0.270737
#12	0.289063	0.314541	0.26089	0.24775
#13	0.424582	0.269807	0.240056	0.235313
#14	0.207661	0.263468	0.328039	0.178505
#15	0.291934	0.287633	0.32477	0.208534
#16	0.280584	0.236556	0.324819	0.294863
#17	0.341942	0.326897	0.304569	0.241043
#18	0.327867	0.238903	0.270488	0.293823
#19	0.27768	0.277336	0.270565	0.252104
#20	0.33541	0.264731	0.308496	0.203563
#21	0.328941	0.293153	0.309748	0.251192
#22	0.276808	0.268757	0.29147	0.24278
#23	0.351637	0.356805	0.302167	0.248824
#24	0.310255	0.297393	0.265972	0.212207
#25	0.378295	0.287587	0.274515	0.219191
#26	0.379198	0.318825	0.253366	0.269379
#27	0.366357	0.273817	0.267864	0.323649
#28	0.297997		0.315257	0.264341
#29			0.279987	0.206353
#30			0.280003	0.252729
#31			0.281212
#32			0.31646
#33			0.269699
