# Supplementary material for: Tumor elimination by clustered microRNAs miR-306 and miR-79 via noncanonical activation of JNK signaling
Source: eLife journal article supplement (doi:10.7554/elife.77340), 2022-10-12
Supplement: fig1-data2 [file Genotypes for Figure 1 and Figure 1—figure supplements.xls]

## Sheet: Sheet1
	Genotype
Figure 1A	Tub-Gal80, FRT19A/FRT19A; +/eyFLP5, Act>y+>Gal4, UAS-GFP; +
Figure 1B	Tub-Gal80, FRT19A/FRT19A; +/eyFLP5, Act>y+>Gal4, UAS-GFP; UAS-Luc/+
Figure 1C	Tub-Gal80, FRT19A/dlg[m52],FRT19A; UAS-Ras[v12]/eyFLP5, Act>y+>Gal4, UAS-GFP; +
Figure 1D	Tub-Gal80, FRT19A/dlg[m52],FRT19A; UAS-Ras[v12]/eyFLP5, Act>y+>Gal4, UAS-GFP; UAS-Luc/+
Figure 1E	Tub-Gal80, FRT19A/dlg[m52],FRT19A; UAS-Ras[v12]/eyFLP5, Act>y+>Gal4, UAS-GFP; UAS-miR-9c,306,79,9b/+
Figure 1F	Tub-Gal80, FRT19A/dlg[m52],FRT19A; UAS-Ras[v12]/eyFLP5, Act>y+>Gal4, UAS-GFP; UAS-miR-306/+
Figure 1G	Tub-Gal80, FRT19A/dlg[m52],FRT19A; UAS-Ras[v12]/eyFLP5, Act>y+>Gal4, UAS-GFP; UAS-miR-79/+
Figure 1I	Tub-Gal80, FRT19A/dlg[m52],FRT19A; UAS-Ras[v12]/eyFLP5, Act>y+>Gal4, UAS-GFP; UAS-Luc/+
Figure 1I	Tub-Gal80, FRT19A/dlg[m52],FRT19A; UAS-Ras[v12]/eyFLP5, Act>y+>Gal4, UAS-GFP; UAS-miR-306/+
Figure 1I	Tub-Gal80, FRT19A/dlg[m52],FRT19A; UAS-Ras[v12]/eyFLP5, Act>y+>Gal4, UAS-GFP; UAS-miR-79/+
Figure 1J	Tub-Gal80, FRT19A/dlg[m52],FRT19A; UAS-Ras[v12]/eyFLP5, Act>y+>Gal4, UAS-GFP; UAS-Luc/+
Figure 1J	Tub-Gal80, FRT19A/dlg[m52],FRT19A; UAS-Ras[v12]/eyFLP5, Act>y+>Gal4, UAS-GFP; UAS-miR-306/+
Figure 1J	Tub-Gal80, FRT19A/dlg[m52],FRT19A; UAS-Ras[v12]/eyFLP5, Act>y+>Gal4, UAS-GFP; UAS-miR-79/+
Figure 1K	Tub-Gal80, FRT19A/dlg[m52],FRT19A; UAS-Ras[v12]/eyFLP5, Act>y+>Gal4, UAS-GFP; UAS-miR-306/+
Figure 1L	Tub-Gal80, FRT19A/dlg[m52],FRT19A; UAS-Ras[v12]/eyFLP5, Act>y+>Gal4, UAS-GFP; UAS-miR-79/+
Figure 1M	Tub-Gal80, FRT40A/FRT40A; UAS-Luc/eyFLP6, Act>y+>Gal4, UAS-GFP
Figure 1N	Tub-Gal80, FRT40A/FRT40A; UAS-miR-9c,306,79,9b/eyFLP6, Act>y+>Gal4, UAS-GFP
Figure 1O	Tub-Gal80, FRT40A/FRT40A; UAS-miR-306/eyFLP6, Act>y+>Gal4, UAS-GFP
Figure 1P	Tub-Gal80, FRT40A/FRT40A; UAS-miR-79/eyFLP6, Act>y+>Gal4, UAS-GFP
Figure 1-figure suppplement 1A	Tub-Gal80, FRT19A/dlg[m52],FRT19A; UAS-Ras[v12]/eyFLP5, Act>y+>Gal4, UAS-GFP; UAS-bantam/+
Figure 1-figure suppplement 1B	Tub-Gal80, FRT19A/dlg[m52],FRT19A; UAS-miR-2a-2,2a-1,2b-2/UAS-Ras[v12]; +/eyFLP6, Act>y+>Gal4, UAS-GFP
Figure 1-figure suppplement 1C	Tub-Gal80, FRT19A/dlg[m52],FRT19A; UAS-Ras[v12]/eyFLP5, Act>y+>Gal4, UAS-GFP; UAS-miR-2b-1/+
Figure 1-figure suppplement 1D	Tub-Gal80, FRT19A/dlg[m52],FRT19A; UAS-Ras[v12]/eyFLP5, Act>y+>Gal4, UAS-GFP; UAS-miR-7/+
Figure 1-figure suppplement 1E	Tub-Gal80, FRT19A/dlg[m52],FRT19A; UAS-Ras[v12]/eyFLP5, Act>y+>Gal4, UAS-GFP; UAS-miR-8/+
Figure 1-figure suppplement 1F	Tub-Gal80, FRT19A/dlg[m52],FRT19A; UAS-Ras[v12]/eyFLP5, Act>y+>Gal4, UAS-GFP; UAS-miR-9a/+
Figure 1-figure suppplement 1G	Tub-Gal80, FRT19A/dlg[m52],FRT19A; UAS-Ras[v12]/eyFLP5, Act>y+>Gal4, UAS-GFP; UAS-miR-9b/+
Figure 1-figure suppplement 1H	Tub-Gal80, FRT19A/dlg[m52],FRT19A; UAS-Ras[v12]/eyFLP5, Act>y+>Gal4, UAS-GFP; UAS-miR-9c/+
Figure 1-figure suppplement 1I	Tub-Gal80, FRT19A/dlg[m52],FRT19A; UAS-Ras[v12]/eyFLP5, Act>y+>Gal4, UAS-GFP; UAS-miR-11/+
Figure 1-figure suppplement 1J	Tub-Gal80, FRT19A/dlg[m52],FRT19A; UAS-Ras[v12]/eyFLP5, Act>y+>Gal4, UAS-GFP; UAS-miR-12/+
Figure 1-figure suppplement 1K	Tub-Gal80, FRT19A/dlg[m52],FRT19A; UAS-miR-13a,13b-1,2c/UAS-Ras[v12]; +/eyFLP6, Act>y+>Gal4, UAS-GFP
Figure 1-figure suppplement 1L	Tub-Gal80, FRT19A/dlg[m52],FRT19A; UAS-Ras[v12]/eyFLP5, Act>y+>Gal4, UAS-GFP; UAS-miR-13b-2/+
Figure 1-figure suppplement 1M	Tub-Gal80, FRT19A/dlg[m52],FRT19A; UAS-Ras[v12]/eyFLP5, Act>y+>Gal4, UAS-GFP; UAS-miR-14/+
Figure 1-figure suppplement 1N	Tub-Gal80, FRT19A/dlg[m52],FRT19A; UAS-Ras[v12]/eyFLP5, Act>y+>Gal4, UAS-GFP; UAS-miR-34/+
Figure 1-figure suppplement 1O	Tub-Gal80, FRT19A/dlg[m52],FRT19A; UAS-Ras[v12]/eyFLP5, Act>y+>Gal4, UAS-GFP; UAS-miR-92a/+
Figure 1-figure suppplement 1P	Tub-Gal80, FRT19A/dlg[m52],FRT19A; UAS-Ras[v12]/eyFLP5, Act>y+>Gal4, UAS-GFP; UAS-miR-124/+
Figure 1-figure suppplement 1Q	Tub-Gal80, FRT19A/dlg[m52],FRT19A; UAS-Ras[v12]/eyFLP5, Act>y+>Gal4, UAS-GFP; UAS-miR-184/+
Figure 1-figure suppplement 1R	Tub-Gal80, FRT19A/dlg[m52],FRT19A; UAS-Ras[v12]/eyFLP5, Act>y+>Gal4, UAS-GFP; UAS-miR-252/+
Figure 1-figure suppplement 1S	Tub-Gal80, FRT19A/dlg[m52],FRT19A; UAS-Ras[v12]/eyFLP5, Act>y+>Gal4, UAS-GFP; UAS-miR-276a/+
Figure 1-figure suppplement 1T	Tub-Gal80, FRT19A/dlg[m52],FRT19A; UAS-Ras[v12]/eyFLP5, Act>y+>Gal4, UAS-GFP; UAS-miR-276b/+
Figure 1-figure suppplement 1U	Tub-Gal80, FRT19A/dlg[m52],FRT19A; UAS-Ras[v12]/eyFLP5, Act>y+>Gal4, UAS-GFP; UAS-miR-278/+
Figure 1-figure suppplement 1V	Tub-Gal80, FRT19A/dlg[m52],FRT19A; UAS-Ras[v12]/eyFLP5, Act>y+>Gal4, UAS-GFP; UAS-miR-279/+
Figure 1-figure suppplement 1W	Tub-Gal80, FRT19A/dlg[m52],FRT19A; UAS-Ras[v12]/eyFLP5, Act>y+>Gal4, UAS-GFP; UAS-miR-282/+
Figure 1-figure suppplement 1X	Tub-Gal80, FRT19A/dlg[m52],FRT19A; UAS-Ras[v12]/eyFLP5, Act>y+>Gal4, UAS-GFP; UAS-miR-305/+
Figure 1-figure suppplement 1Y	Tub-Gal80, FRT19A/dlg[m52],FRT19A; UAS-Ras[v12]/eyFLP5, Act>y+>Gal4, UAS-GFP; UAS-miR-310/+
Figure 1-figure suppplement 1Z	Tub-Gal80, FRT19A/dlg[m52],FRT19A; UAS-miR-317/UAS-Ras[v12]; +/eyFLP6, Act>y+>Gal4, UAS-GFP
Figure 1-figure suppplement 1AA	Tub-Gal80, FRT19A/dlg[m52],FRT19A; UAS-Ras[v12]/eyFLP5, Act>y+>Gal4, UAS-GFP; UAS-miR-958/+
Figure 1-figure suppplement 1AB	Tub-Gal80, FRT19A/dlg[m52],FRT19A; UAS-Ras[v12]/eyFLP5, Act>y+>Gal4, UAS-GFP; UAS-miR-975,976,977/+
Figure 1-figure suppplement 1AC	Tub-Gal80, FRT19A/dlg[m52],FRT19A; UAS-Ras[v12]/eyFLP5, Act>y+>Gal4, UAS-GFP; UAS-miR-981/+
Figure 1-figure suppplement 1AD	Tub-Gal80, FRT19A/dlg[m52],FRT19A; UAS-Ras[v12]/eyFLP5, Act>y+>Gal4, UAS-GFP; UAS-miR-984/+
Figure 1-figure suppplement 1AE	Tub-Gal80, FRT19A/dlg[m52],FRT19A; UAS-Ras[v12]/eyFLP5, Act>y+>Gal4, UAS-GFP; UAS-miR-988/+
Figure 1-figure suppplement 1AF	Tub-Gal80, FRT19A/dlg[m52],FRT19A; UAS-Ras[v12]/eyFLP5, Act>y+>Gal4, UAS-GFP; UAS-miR-995/+
Figure 1-figure suppplement 1AG	Tub-Gal80, FRT19A/dlg[m52],FRT19A; UAS-miR-996/UAS-Ras[v12]; +/eyFLP6, Act>y+>Gal4, UAS-GFP
Figure 1-figure suppplement 1AH	Tub-Gal80, FRT19A/dlg[m52],FRT19A; UAS-miR-998/UAS-Ras[v12]; +/eyFLP6, Act>y+>Gal4, UAS-GFP
Figure 1-figure suppplement 2A	Tub-Gal80, FRT40A/lgl[4],UAS-Ras[v12],FRT40A; UAS-Luc/eyFLP6, Act>y+>Gal4, UAS-GFP
Figure 1-figure suppplement 2B	Tub-Gal80, FRT40A/lgl[4],UAS-Ras[v12],FRT40A; UAS-miR-9c,306,79,9b/eyFLP6, Act>y+>Gal4, UAS-GFP
Figure 1-figure suppplement 2C	Tub-Gal80, FRT40A/lgl[4],UAS-Ras[v12],FRT40A; UAS-miR-306/eyFLP6, Act>y+>Gal4, UAS-GFP
Figure 1-figure suppplement 2D	Tub-Gal80, FRT40A/lgl[4],UAS-Ras[v12],FRT40A; UAS-miR-79/eyFLP6, Act>y+>Gal4, UAS-GFP
