# Supplementary material for: Tumor elimination by clustered microRNAs miR-306 and miR-79 via noncanonical activation of JNK signaling
Source: eLife journal article supplement (doi:10.7554/elife.77340), 2022-10-12
Supplement: fig1-figsupp1-data1 [file Figure 1—figure supplement 1AI.xls]

## Sheet: Sheet1
	Figure 1D (control)	A	B	C	D	E	F	G	H	I	J	K	L	M	N	O	P	Q	R	S	T	U	V	W	X	Y	Z	AA	AB	AC	AD	AE	AF	AG	AH
#1	0.649002	0.89765	0.573697	0.874259	0.0653923	0.674074	0.38261	0.658357	0.515878	0.51805	0.565228	0.327438	0.629136	0.606881	0.665995	N/A	N/A	N/A	0.420491	0.184107	0.197947	0.401622	0.457586	0.204006	0.444261	0.41124	0.0834729	0.62278	0.510602	0.207772	0.606496	0.484207	0.666858	0.479933	0.397451
#2	0.477798	0.902217	0.576144	0.85078	0.0685223	0.766771	0.683373	0.510021	0.740623	0.555556	0.579283	0.521335	0.654053	0.79053	0.7272				0.240872	0.299687	0.209967	0.383896	0.265896	0.297391	0.375533	0.219055	0.115495	0.80351	0.609368	0.427563	0.510223	0.428876	0.456363	0.572922	0.293015
#3	0.788039	0.882321	0.540096	0.724356	0.144322	0.477114	0.366974	0.45613	0.887365	0.478304	0.585359	0.44295	0.685887	0.539588	0.275428				0.536693	0.459463	0.25653	0.388151	0.541022	0.1939	0.593843	0.131658	0.140403	0.903813	0.639641	0.255877	0.409452	0.239405	0.563207	0.546143	0.728864
#4	0.711872	0.922876	0.489889	0.751425	0.231893	0.4931	0.395037	0.685445	0.535611	0.56248	0.646278	0.372353	0.572153	0.692997	0.49573				0.361274	0.187605	0.318794	0.529555	0.475713	0.258805	0.595036	0.241464	0.0685114	0.675921	0.526275	0.329721	0.422666	0.164833	0.560385	0.724343	0.800646
#5	0.871905	0.853143	0.861738	0.562572	0.0309324	0.566221	0.737661	0.824706	0.642193	0.420157	0.322608	0.363191	0.563745	0.687398	0.656669				0.305821	0.213063	0.162291	0.819092	0.563925	0.223467	0.455714	0.328006	0.0606115	0.829854	0.583957	0.478955	0.554521	0.189281	0.448003	0.479449	0.732175
#6	0.712906	0.831252	0.486718	0.754867	0.0939905	0.497715	0.730823	0.725441	0.868057	0.539678	0.38225	0.433034	0.769807	0.588239	0.57607				0.169815	0.13134	0.315334	0.801317	0.428873	0.302502	0.358775	0.224288	0.0563376	0.480606	0.528392	0.438616	0.464329	0.272536	0.475359	0.615431	0.413778
#7	0.609889	0.947076	0.663913	0.840623	0.101996	0.652681	0.76879	0.22496	0.477349	0.481556	0.5429	0.409851	0.486294	0.467578	0.512606				0.161123	0.251746	0.278245	0.531358	0.548389	0.397473	0.561687	0.222348	0.106353	0.623242	0.498104	0.214902	0.757497	0.29778	0.394708	0.45569	0.421772
#8	0.517206	0.926945	0.502618	0.460827	0.199097	0.635115	0.510372	0.552105	0.461972	0.697754	0.598746	0.486279	0.563475	0.310122	0.530902				0.291937	0.217755	0.121406	0.77516	0.489167	0.25669	0.378093	0.26368	0.0564377	0.725985	0.51483	0.297601	0.538214	0.135772	0.337153	0.62757	0.600716
#9	0.73267	0.903262	0.627967	0.8353	0.147519	0.501551	0.785428	0.501191	0.56469	0.666795	0.655157	0.40498	0.775279	0.637963	0.57718				0.163881	0.139448	0.293836	0.481536	0.478934	0.161068	0.47049	0.404899	0.154495	0.51189	0.643127	0.361922	0.468403	0.120668	0.287714	0.585423	0.475933
#10	0.786154	0.881207	0.504111	0.690269	0.124479	0.453989	0.676581	0.326602	0.6413	0.669997	0.658055	0.439358	0.870215	0.765623	0.395605				0.421158	0.314118	0.349936	0.60452	0.613905	0.0780303	0.393801	0.357436	0.0735145	0.788603	0.5661	0.320839	0.382696	0.230628	0.742486	0.666029	0.346896
#11	0.748556	0.937345	0.432873	0.516308	0.133391	0.513964	0.791528	0.614894	0.425987	0.362358	0.705745	0.527439	0.623495	0.351385	0.573438				0.241599	0.548373	0.400676	0.305274	0.434453	0.384231	0.59981	0.559162	0.0736732	0.683665	0.638381	0.33473	0.458054	0.320817	0.514384	0.665649	0.682082
#12	0.562575	0.875912	0.612999	0.748496	0.162071	0.525159	0.463606	0.445483	0.424192	0.373865	0.399714	0.428542	0.464945	0.581277	0.517677				0.379254	0.373883	0.273866	0.439289	0.547527	0.156809	0.500215	0.337827	0.0876227	0.909162	0.319859	0.371956	0.355814	0.398702	0.590897	0.568315	0.529389
#13	0.881752	0.909461	0.704042	0.524712	0.16836	0.6045	0.498321	0.297183	0.686306	0.473433	0.277013	0.594092	0.706659	0.445021	0.648302				0.356202	0.1939	0.151997	0.488208	0.581743	0.276531	0.405786	0.30872	0.0406235	0.910674	0.609983	0.208653	0.753428	0.445653	0.20924	0.282919	0.74678
#14	0.532748	0.81818	0.751509	0.887517	0.126401	0.58021	0.566038	0.540658	0.791608	0.390454	0.605525	0.745048	0.321565	0.605368	0.630324				0.191575	0.484192	0.103047	0.472689	0.697613	0.375826	0.330704	0.26855	0.0456057	0.740589	0.424093	0.330878	0.745384	0.131916	0.461346	0.382756	0.644596
#15	0.814417	0.840092	0.698898	0.913703	0.099577	0.544988	0.420935	0.584806	0.552305	0.713946	0.602151	0.395483	0.709908	0.574895	0.737346				0.352309	0.310821	0.0826471	0.54231	0.644655	0.172322	0.520311	0.407556	0.281248	0.859057	0.457845	0.322781	0.514878	0.221917	0.699312	0.614886	0.432534
#16	0.744637	0.677666	0.588664	0.817299	0.0596949	0.610619	0.612814	0.68977	0.382453	0.647182	0.654275	0.494388	0.79878	0.540906	0.765837				0.283877	0.377968	0.173408	0.627566	0.620267	0.230544	0.470579	0.290647	0.0376661	0.707677	0.557336	0.255464	0.672382	0.259326	0.544764	0.599459	0.58537
#17	0.594302	0.893174	0.758887	0.848311	0.174755	0.715543	0.542158	0.738624	0.726729	0.49127	0.476239	0.526989	0.787232	0.412429	0.764045				0.195699	0.212727	0.196041	0.433049	0.710717	0.219533	0.474343	0.508992	0.037104	0.470446	0.490766	0.338743	0.507607	0.221023	0.36219	0.452418	0.644971
#18	0.549243	0.885421	0.736826	0.806012	0.157524	0.642817	0.568349	0.71103	0.33805	0.436817	0.559662	0.566479	0.707333	0.430783	0.539973				0.268702	0.260296	0.235789	0.723287	0.676023	0.274859	0.286561	0.514034	0.0801295	0.706756	0.820473		0.384793	0.229829	0.310986	0.581288	0.726767
#19	0.627863	0.938485	0.662866	0.907249	0.172664	0.597695		0.589419	0.479021	0.434265					0.539752				0.279013	0.218625	0.716178	0.547618	0.376031	0.233916	0.527612	0.229684	0.184559	0.824715	0.714897		0.348131	0.141613	0.510692	0.659698	0.513971
#20	0.587611	0.951302			0.0820575	0.740536		0.688137	0.887298											0.231151	0.590585	0.553188		0.252296	0.641792	0.596762	0.0583122	0.861507	0.633981			0.1867	0.369575	0.744761
#21	0.531286								0.464464											0.254861				0.302837			0.0648151		0.667206			0.244847	0.387013	0.402023
#22	0.736963								0.662221																				0.388688			0.458138	0.533061	0.595412
#23	0.577551								0.576142																							0.379397
#24	0.616063								0.611706
#25	0.626026								0.648017
#26	0.552959
#27	0.644716
#28	0.530843
#29	0.645504
#30	0.352098
#31	0.460897
#32	0.659445
#33	0.52343
#34	0.443018
#35	0.485683
#36	0.599004
#37	0.732572
#38	0.766229
#39	0.555847
#40	0.585383
#41	0.52487
#42	0.431683
