# Supplementary material for: Tumor elimination by clustered microRNAs miR-306 and miR-79 via noncanonical activation of JNK signaling
Source: eLife journal article supplement (doi:10.7554/elife.77340), 2022-10-12
Supplement: fig1-figsupp2-data1 [file Figure 1—figure supplement 2E.xls]

## Sheet: Sheet1
	A	B	C	D
#1	0.857226	0.442076	0.391301	0.336939
#2	0.751584	0.45278	0.346884	0.415321
#3	0.792304	0.356667	0.286352	0.46348
#4	0.804234	0.185099	0.285765	0.345399
#5	0.83741	0.330381	0.443877	0.406401
#6	0.764643	0.526574	0.443453	0.477412
#7	0.848291	0.65722	0.378739	0.525999
#8	0.939667	0.491498	0.506659	0.37794
#9	0.925253	0.392886	0.358268	0.37853
#10	0.931798	0.570841	0.512778	0.416532
#11	0.644798	0.505126	0.333431	0.316969
#12	0.753376	0.386594	0.320426	0.377223
#13	0.635923	0.323855	0.316993	0.273823
#14	0.918197	0.594727	0.426089	0.470643
#15	0.879482	0.626624	0.355657	0.356454
#16	0.725796	0.429767	0.293665	0.373252
#17	0.918059	0.388468	0.496374	0.326429
#18	0.837056	0.468091	0.33141	0.621552
#19	0.865495	0.362643	0.282969	0.459294
#20	0.814195	0.323413	0.146984	0.297513
#21	0.843555	0.343576	0.405248	0.355202
#22				0.340041
