# Supplementary material for: Tumor elimination by clustered microRNAs miR-306 and miR-79 via noncanonical activation of JNK signaling
Source: eLife journal article supplement (doi:10.7554/elife.77340), 2022-10-12
Supplement: fig2-data1 [file Figure 2F.xls]

## Sheet: Sheet1
	A	B	C	D	E
#1	8.41786	3.69656	37.2067	54.2295	42.7411
#2	17.6573	2.46273	20.0239	35.1949	63.1392
#3	14.4327	1.53991	60.4887	62.5878	42.6789
#4	11.9607	4.27189	52.8347	28.9336	26.1019
#5	24.6834	5.81849	61.7029	27.1698	28.2297
#6	14.0478	4.87278	37.7214	37.068	27.4614
#7	6.37349	14.1036	34.0946	36.3123	18.1909
#8	9.23994	5.7602	24.6053	32.6814	33.4422
#9	8.3876	3.08047	38.9968	16.476	26.2217
#10	13.4896		74.5827	34.8279	12.5178
#11	7.57929			38.331
#12	4.13103			24.2173
#13	9.50451			22.7402
#14				33.0594
