# Supplementary material for: Tumor elimination by clustered microRNAs miR-306 and miR-79 via noncanonical activation of JNK signaling
Source: eLife journal article supplement (doi:10.7554/elife.77340), 2022-10-12
Supplement: fig2-data1 [file Figure 2O.xls]

## Sheet: Sheet1
	G	H	I	J	K	L	M	N
#1	0.282918	0.343949	0.728499	0.330697	0.0812452	0.587478	0.583691	0.397062
#2	0.26528	0.33282	0.665931	0.119914	0.114751	0.471484	0.604015	0.282768
#3	0.35571	0.373577	0.537672	0.204777	0.229322	0.50568	0.473385	0.538675
#4	0.362685	0.367068	0.555909	0.16458	0.1654	0.534775	0.619587	0.655868
#5	0.305048	0.350691	0.668136	0.273484	0.30578	0.62028	0.69505	0.506413
#6	0.411518	0.267225	0.614962	0.321999	0.232103	0.731397	0.59663	0.63371
#7	0.413935	0.424942	0.592972	0.436245	0.126902	0.52784	0.544654	0.509029
#8	0.336835	0.304476	0.602431	0.139755	0.284806	0.527733	0.559226	0.721324
#9	0.330548	0.371561	0.588549	0.325406	0.186663	0.508967	0.58688	0.501868
#10	0.408943	0.17988	0.649141	0.160565	0.2001	0.72855	0.457459	0.379088
#11	0.408512	0.273511	0.522565	0.266588	0.339706	0.345547	0.549136	0.398455
#12	0.261357	0.230219	0.55545	0.201783	0.152335	0.420541	0.61592	0.530629
#13	0.3947	0.369261	0.675644	0.173535	0.280656	0.642971	0.536099	0.380573
#14	0.487596	0.442099	0.616567		0.183204	0.433646	0.746391	0.538048
#15	0.437942	0.366551	0.555356		0.269555	0.562498	0.511618	0.220225
#16			0.561783		0.199711	0.534682	0.360021	0.269226
#17					0.140062	0.813899	0.482658
#18					0.0996934	0.544699
#19						0.605826
#20						0.54942
#21						0.649494
