# Supplementary material for: Tumor elimination by clustered microRNAs miR-306 and miR-79 via noncanonical activation of JNK signaling
Source: eLife journal article supplement (doi:10.7554/elife.77340), 2022-10-12
Supplement: fig2-data1 [file Figure 2T.xls]

## Sheet: Sheet1
	P	Q	R	S
#1	8.48723	10.0232	7.25617	7.79658
#2	7.74849	5.72968	11.3954	6.99114
#3	13.5241	7.97081	8.62543	17.8477
#4	12.0947	4.1511	27.2479	9.29161
#5	18.4576	5.75216	10.4419	2.3492
#6	7.06613	7.35069	8.0912	4.29076
#7	4.48448	10.0684	5.0443	2.2908
#8	3.53935	5.29974	6.00768	3.53591
#9	2.13027	6.03807	8.16722	4.96077
#10	7.5475	3.62188	8.29175	7.76462
#11	4.53848	13.7732	4.58206
