# Supplementary material for: Tumor elimination by clustered microRNAs miR-306 and miR-79 via noncanonical activation of JNK signaling
Source: eLife journal article supplement (doi:10.7554/elife.77340), 2022-10-12
Supplement: fig3-data1 [file Figure 3AB.xls]

## Sheet: Sheet1
	H	Y	J	Z	K	AA
#1	0.117808	0.280871	0.0270503	0.29568	0.0732286	0.241574
#2	0.0944806	0.322942	0.0206826	0.233224	0.0403362	0.268568
#3	0.117088	0.192564	0.040891	0.310003	0.0606147	0.222214
#4	0.086542	0.260963	0.0378431	0.283256	0.0326655	0.187069
#5	0.119214	0.337747	0.0454952	0.247693	0.0605783	0.238983
#6	0.0941282	0.280189	0.0691431	0.187495	0.0368461	0.246726
#7	0.124348	0.321183	0.0472384	0.2999	0.0491533	0.248088
#8	0.0644542	0.320081	0.0484326	0.295104	0.0486283	0.221456
#9	0.0637565	0.293926	0.0384306	0.214953	0.0143275	0.252831
#10	0.0566334	0.371408	0.0421185	0.341048	0.0420685	0.268075
#11	0.0633049	0.327153	0.0649915	0.287225	0.0588067	0.293351
#12	0.0977861	0.366376	0.0718707	0.284215	0.0780766	0.244056
#13	0.0863258	0.314657	0.0592351	0.257794	0.0512514	0.226077
#14	0.0966064	0.276309	0.087038	0.251044		0.290111
#15		0.372651	0.0620373	0.249157		0.262883
#16		0.270443	0.0624242	0.289015		0.245255
#17		0.442587				0.312538
#18		0.388321				0.404538
#19		0.404068				0.218522
#20		0.349464				0.275617
#21		0.375326
