# Supplementary material for: Tumor elimination by clustered microRNAs miR-306 and miR-79 via noncanonical activation of JNK signaling
Source: eLife journal article supplement (doi:10.7554/elife.77340), 2022-10-12
Supplement: fig3-data1 [file Figure 3F.xls]

## Sheet: Sheet1
	A	B	C	D	E
#1	0.423283	0.0848269	0.0415721	0.0409465	0.0291409
#2	0.373224	0.0648537	0.02562	0.043404	0.0460535
#3	0.320129	0.0667299	0.0444094	0.0242462	0.0211232
#4	0.288907	0.045097	0.0517498	0.0332593	0.0239584
#5	0.268516	0.0633741	0.0325187	0.0195136	0.0350479
#6	0.361082	0.0704266	0.0424243	0.0471818	0.0308795
#7	0.37924	0.0718497	0.0565107	0.0245023	0.0185432
#8	0.198781	0.0589522	0.0559856	0.038987	0.0232233
#9	0.411605	0.107589	0.0264781	0.0265787	0.0191652
#10	0.365978	0.085979	0.0483136	0.0372179	0.023071
#11	0.34564	0.105389	0.034121	0.0474533	0.0246653
#12	0.339908	0.0926075	0.052378	0.0309822
#13	0.315402	0.111178		0.0392132
#14	0.27132	0.0867885		0.0402545
#15	0.321207	0.0739284		0.0484598
#16	0.311281	0.0926917		0.030337
#17		0.0727693		0.0362888
#18		0.0787424		0.0509135
#19		0.0887998		0.0433967
#20		0.0485505		0.041318
#21		0.0526873
#22		0.0775545
#23		0.0563938
#24		0.10637
#25		0.0741454
#26		0.117189
#27		0.0835061
