# Supplementary material for: Tumor elimination by clustered microRNAs miR-306 and miR-79 via noncanonical activation of JNK signaling
Source: eLife journal article supplement (doi:10.7554/elife.77340), 2022-10-12
Supplement: fig3-data1 [file Figure 3P.xls]

## Sheet: Sheet1
	A	G	H	I	J	K	L	M	N	O
#1	0.423283	0.407381	0.117808	0.0556358	0.0270503	0.0732286	0.140659	0.153742	0.132138	0.121085
#2	0.373224	0.222058	0.0944806	0.0629933	0.0206826	0.0403362	0.0953207	0.134369	0.125573	0.0916566
#3	0.320129	0.249968	0.117088	0.0738909	0.040891	0.0606147	0.139101	0.193769	0.128335	0.120994
#4	0.288907	0.390025	0.086542	0.0426253	0.0378431	0.0326655	0.163938	0.164425	0.108552	0.129652
#5	0.268516	0.37169	0.119214	0.0574338	0.0454952	0.0605783	0.182967	0.0731833	0.134	0.140748
#6	0.361082	0.290588	0.0941282	0.0541348	0.0691431	0.0368461	0.179444	0.0895776	0.117804	0.123742
#7	0.37924	0.302157	0.124348	0.0472894	0.0472384	0.0491533	0.183033	0.118051	0.201203	0.126893
#8	0.198781	0.321598	0.0644542	0.0299741	0.0484326	0.0486283	0.132893	0.0932236	0.179538	0.102486
#9	0.411605	0.396241	0.0637565	0.0208104	0.0384306	0.0143275	0.138826	0.105883	0.113048	0.112925
#10	0.365978	0.309504	0.0566334	0.0233017	0.0421185	0.0420685	0.161849	0.184412	0.139416	0.0927812
#11	0.34564	0.383219	0.0633049	0.0238723	0.0649915	0.0588067	0.130167	0.154107	0.11988	0.161949
#12	0.339908	0.370443	0.0977861	0.017712	0.0718707	0.0780766	0.174277	0.120808	0.111508	0.107808
#13	0.315402	0.379036	0.0863258	0.0157832	0.0592351	0.0512514	0.10376	0.0851833	0.143283	0.088136
#14	0.27132	0.397828	0.0966064	0.0172079	0.087038		0.138874	0.171208	0.13192	0.0858606
#15	0.321207	0.361129			0.0620373		0.209502		0.0871467	0.105677
#16	0.311281				0.0624242		0.127613		0.112932	0.138309
#17							0.226161		0.144852	0.092644
#18							0.236215		0.11734	0.101432
