# Supplementary material for: Tumor elimination by clustered microRNAs miR-306 and miR-79 via noncanonical activation of JNK signaling
Source: eLife journal article supplement (doi:10.7554/elife.77340), 2022-10-12
Supplement: fig3-data1 [file Figure 3X.xls]

## Sheet: Sheet1
	A	Q	R	S	T	U	V	W
#1	0.423283	0.326014	0.654358	0.432407	0.297614	0.443128	0.437838	0.394627
#2	0.373224	0.291722	0.65684	0.284808	0.234162	0.337779	0.421917	0.544802
#3	0.320129	0.31251	0.596525	0.278366	0.120432	0.36383	0.347019	0.359461
#4	0.288907	0.23723	0.541351	0.186882	0.175165	0.420845	0.469395	0.355941
#5	0.268516	0.457733	0.697631	0.396082	0.254911	0.532242	0.441747	0.356202
#6	0.361082	0.390334	0.698339	0.221727	0.343011	0.491437	0.522629	0.247573
#7	0.37924	0.347561	0.735739	0.385768	0.0799686	0.454101	0.478471	0.373565
#8	0.198781	0.367677	0.758065	0.264893	0.274595	0.392962	0.405469	0.391952
#9	0.411605	0.253001	0.732964	0.0932369	0.222299	0.431448	0.495089	0.391686
#10	0.365978	0.265183	0.677083	0.355149	0.165912	0.284572	0.468666	0.317546
#11	0.34564	0.449041	0.675093	0.24104	0.157278	0.408249	0.29402	0.31281
#12	0.339908	0.417821	0.736008	0.261269	0.159347	0.45167	0.259477	0.282449
#13	0.315402	0.36323	0.686593	0.221873	0.20341	0.41323	0.283817
#14	0.27132	0.308399	0.667914	0.331602	0.277648		0.370853
#15	0.321207	0.312517	0.694579	0.164714	0.251869
#16	0.311281	0.31408	0.675915	0.188213	0.137293
#17		0.307926	0.640241	0.135362	0.156664
#18		0.408229	0.706032	0.161119	0.194008
#19		0.365976
#20		0.411367
#21		0.238633
#22		0.340242
#23		0.268917
#24		0.373276
#25		0.318539
#26		0.365574
