# Supplementary material for: Tumor elimination by clustered microRNAs miR-306 and miR-79 via noncanonical activation of JNK signaling
Source: eLife journal article supplement (doi:10.7554/elife.77340), 2022-10-12
Supplement: fig3-data2 [file Genotypes for Figure 3 and Figure 3—figure supplements.xls]

## Sheet: Sheet1
	Genotype
Figure 3A	Tub-Gal80, FRT19A/FRT19A; +/eyFLP5, Act>y+>Gal4, UAS-GFP; UAS-Luc/+
Figure 3B	Tub-Gal80, FRT19A/dlg[m52],FRT19A; +/eyFLP5, Act>y+>Gal4, UAS-GFP; UAS-Luc/+
Figure 3C	Tub-Gal80, FRT19A/dlg[m52],FRT19A; +/eyFLP5, Act>y+>Gal4, UAS-GFP; UAS-miR-9c,306,79,9b/+
Figure 3D	Tub-Gal80, FRT19A/dlg[m52],FRT19A; +/eyFLP5, Act>y+>Gal4, UAS-GFP; UAS-miR-306/+
Figure 3E	Tub-Gal80, FRT19A/dlg[m52],FRT19A; +/eyFLP5, Act>y+>Gal4, UAS-GFP; UAS-miR-79/+
Figure 3G	Tub-Gal80, FRT19A/FRT19A; +/eyFLP5, Act>y+>Gal4, UAS-GFP; UAS-p35/+
Figure 3H	Tub-Gal80, FRT19A/dlg[m52],FRT19A; +/eyFLP5, Act>y+>Gal4, UAS-GFP; UAS-Luc/UAS-Luc
Figure 3I	Tub-Gal80, FRT19A/dlg[m52],FRT19A; +/eyFLP5, Act>y+>Gal4, UAS-GFP; UAS-miR-9c,306,79,9b/UAS-Luc
Figure 3J	Tub-Gal80, FRT19A/dlg[m52],FRT19A; +/eyFLP5, Act>y+>Gal4, UAS-GFP; UAS-miR-306/UAS-Luc
Figure 3K	Tub-Gal80, FRT19A/dlg[m52],FRT19A; +/eyFLP5, Act>y+>Gal4, UAS-GFP; UAS-miR-79/UAS-Luc
Figure 3L	Tub-Gal80, FRT19A/dlg[m52],FRT19A; +/eyFLP5, Act>y+>Gal4, UAS-GFP; UAS-Luc/UAS-p35
Figure 3M	Tub-Gal80, FRT19A/dlg[m52],FRT19A; +/eyFLP5, Act>y+>Gal4, UAS-GFP; UAS-miR-9c,306,79,9b/UAS-p35
Figure 3N	Tub-Gal80, FRT19A/dlg[m52],FRT19A; +/eyFLP5, Act>y+>Gal4, UAS-GFP; UAS-miR-306/UAS-p35
Figure 3O	Tub-Gal80, FRT19A/dlg[m52],FRT19A; +/eyFLP5, Act>y+>Gal4, UAS-GFP; UAS-miR-79/UAS-p35
Figure 3Q	Tub-Gal80, FRT19A/FRT19A; +/eyFLP5, Act>y+>Gal4, UAS-GFP; UAS-Bsk[DN]/+
Figure 3R	Tub-Gal80, FRT19A/dlg[m52],FRT19A; UAS-Ras[v12]/eyFLP5, Act>y+>Gal4, UAS-GFP; UAS-Luc/UAS-Luc
Figure 3S	Tub-Gal80, FRT19A/dlg[m52],FRT19A; UAS-Ras[v12]/eyFLP5, Act>y+>Gal4, UAS-GFP; UAS-miR-306/UAS-Luc
Figure 3T	Tub-Gal80, FRT19A/dlg[m52],FRT19A; UAS-Ras[v12]/eyFLP5, Act>y+>Gal4, UAS-GFP; UAS-miR-79/UAS-Luc
Figure 3U	Tub-Gal80, FRT19A/dlg[m52],FRT19A; UAS-Ras[v12]/eyFLP5, Act>y+>Gal4, UAS-GFP; UAS-Luc/UAS-Bsk[DN]
Figure 3V	Tub-Gal80, FRT19A/dlg[m52],FRT19A; UAS-Ras[v12]/eyFLP5, Act>y+>Gal4, UAS-GFP; UAS-miR-306/UAS-Bsk[DN]
Figure 3W	Tub-Gal80, FRT19A/dlg[m52],FRT19A; UAS-Ras[v12]/eyFLP5, Act>y+>Gal4, UAS-GFP; UAS-miR-79/UAS-Bsk[DN]
Figure 3Y	Tub-Gal80, FRT19A/dlg[m52],FRT19A; +/eyFLP5, Act>y+>Gal4, UAS-GFP; UAS-Luc/UAS-Bsk[DN]
Figure 3Z	Tub-Gal80, FRT19A/dlg[m52],FRT19A; +/eyFLP5, Act>y+>Gal4, UAS-GFP; UAS-miR-306/UAS-Bsk[DN]
Figure 3AA	Tub-Gal80, FRT19A/dlg[m52],FRT19A; +/eyFLP5, Act>y+>Gal4, UAS-GFP; UAS-miR-79/UAS-Bsk[DN]
Figure 3-figure suppplement 1A	Tub-Gal80, FRT40A/UAS-Ras[v12],FRT40A; UAS-Luc/eyFLP6, Act>y+>Gal4, UAS-GFP
Figure 3-figure suppplement 1B	Tub-Gal80, FRT40A/UAS-Ras[v12],FRT40A; UAS-miR-9c,306,79,9b/eyFLP6, Act>y+>Gal4, UAS-GFP
Figure 3-figure suppplement 1C	Tub-Gal80, FRT40A/UAS-Ras[v12],FRT40A; UAS-miR-306/eyFLP6, Act>y+>Gal4, UAS-GFP
Figure 3-figure suppplement 1D	Tub-Gal80, FRT40A/UAS-Ras[v12],FRT40A; UAS-miR-79/eyFLP6, Act>y+>Gal4, UAS-GFP
Figure 3-figure suppplement 2A	Tub-Gal80, FRT40A/FRT40A; UAS-Luc/eyFLP6, Act>y+>Gal4, UAS-GFP
Figure 3-figure suppplement 2B	Tub-Gal80, FRT40A/FRT40A; UAS-miR-306/eyFLP6, Act>y+>Gal4, UAS-GFP
Figure 3-figure suppplement 2C	Tub-Gal80, FRT40A/FRT40A; UAS-miR-79/eyFLP6, Act>y+>Gal4, UAS-GFP
Figure 3-figure suppplement 2D	Tub-Gal80, FRT19A/FRT19A; +/eyFLP5, Act>y+>Gal4, UAS-GFP; UAS-Luc/puc-lacZ
Figure 3-figure suppplement 2E	Tub-Gal80, FRT19A/FRT19A; +/eyFLP5, Act>y+>Gal4, UAS-GFP; UAS-miR-306/puc-lacZ
Figure 3-figure suppplement 2F	Tub-Gal80, FRT19A/FRT19A; +/eyFLP5, Act>y+>Gal4, UAS-GFP; UAS-miR-79/puc-lacZ
Figure 3-figure suppplement 2G	GMR-Gal4, UAS-GFP/+; UAS-Luc/+
Figure 3-figure suppplement 2G	GMR-Gal4, UAS-GFP/+; UAS-miR-306/+
Figure 3-figure suppplement 2G	GMR-Gal4, UAS-GFP/+; UAS-miR-79/+
Figure 3-figure suppplement 2I	GMR-Gal4, UAS-GFP/+; UAS-Luc/+
Figure 3-figure suppplement 2J	GMR-Gal4, UAS-GFP/+; UAS-miR-306/+
Figure 3-figure suppplement 2K	GMR-Gal4, UAS-GFP/+; UAS-miR-79/+
Figure 3-figure suppplement 2M	GMR-Gal4, UAS-GFP/UAS-Eiger[regg1]; UAS-Luc/+
Figure 3-figure suppplement 2N	GMR-Gal4, UAS-GFP/UAS-Eiger[regg1]; UAS-miR-306/+
Figure 3-figure suppplement 2O	GMR-Gal4, UAS-GFP/UAS-Eiger[regg1]; UAS-miR-79/+
Figure 3-figure suppplement 3A	UAS-Bsk[DN]/+ or Y; Tub-Gal80, FRT40A/lgl[4],UAS-Ras[v12],FRT40A; UAS-Luc/eyFLP6, Act>y+>Gal4, UAS-GFP
Figure 3-figure suppplement 3B	UAS-Bsk[DN]/+ or Y; Tub-Gal80, FRT40A/lgl[4],UAS-Ras[v12],FRT40A; UAS-miR-306/eyFLP6, Act>y+>Gal4, UAS-GFP
Figure 3-figure suppplement 3C	UAS-Bsk[DN]/+ or Y; Tub-Gal80, FRT40A/lgl[4],UAS-Ras[v12],FRT40A; UAS-miR-79/eyFLP6, Act>y+>Gal4, UAS-GFP
Figure 3-figure suppplement 3E	Tub-Gal80, FRT40A/lgl[4],FRT40A; UAS-Luc/eyFLP6, Act>y+>Gal4, UAS-GFP
Figure 3-figure suppplement 3F	Tub-Gal80, FRT40A/lgl[4],FRT40A; UAS-miR-306/eyFLP6, Act>y+>Gal4, UAS-GFP
Figure 3-figure suppplement 3G	Tub-Gal80, FRT40A/lgl[4],FRT40A; UAS-miR-79/eyFLP6, Act>y+>Gal4, UAS-GFP
Figure 3-figure suppplement 3H	UAS-Bsk[DN]/+ or Y; Tub-Gal80, FRT40A/lgl[4],FRT40A; UAS-Luc/eyFLP6, Act>y+>Gal4, UAS-GFP
Figure 3-figure suppplement 3I	UAS-Bsk[DN]/+ or Y; Tub-Gal80, FRT40A/lgl[4],FRT40A; UAS-miR-306/eyFLP6, Act>y+>Gal4, UAS-GFP
Figure 3-figure suppplement 3J	UAS-Bsk[DN]/+ or Y; Tub-Gal80, FRT40A/lgl[4],FRT40A; UAS-miR-79/eyFLP6, Act>y+>Gal4, UAS-GFP
