# Supplementary material for: Tumor elimination by clustered microRNAs miR-306 and miR-79 via noncanonical activation of JNK signaling
Source: eLife journal article supplement (doi:10.7554/elife.77340), 2022-10-12
Supplement: fig3-figsupp2-data1 [file Figure 3—figure supplement 2H.xls]

## Sheet: Sheet1
	lane 1	lane 2	lane 3
#1	1	2.373	2.219
#2	1	3.164	2.893
#3	1	2.672	2.247
