# Supplementary material for: Tumor elimination by clustered microRNAs miR-306 and miR-79 via noncanonical activation of JNK signaling
Source: eLife journal article supplement (doi:10.7554/elife.77340), 2022-10-12
Supplement: fig3-figsupp2-data1 [file Figure 3—figure supplement 2L.xls]

## Sheet: Sheet1
	I	J	K
#1	1.01901	0.919057	0.949216
#2	1.0196	0.857994	0.889075
#3	1.01079	0.852454	0.960008
#4	0.911496	0.972736	0.90644
#5	0.861533	1.00048	1.02351
#6	0.942116	0.959921	1.0145
#7	0.918002	0.950249	1.10258
#8	1.02257	0.927586	0.918816
#9	0.892218	0.90622	0.932796
#10	0.982166	0.957371	1.04947
#11	1.08027	1.05653	0.894065
#12	1.03982	1.04954	0.919871
#13	1.03903	0.987485	0.942643
#14	0.946952	1.05506	0.92341
#15	1.09117	0.99131	0.954117
#16	1.07798	0.983111	0.926531
#17	1.09552	1.00788	0.957173
#18	0.981814	0.905847	0.928311
#19	1.06644	1.07365	0.957656
#20	1.00151	1.06941	1.05114
