# Supplementary material for: Tumor elimination by clustered microRNAs miR-306 and miR-79 via noncanonical activation of JNK signaling
Source: eLife journal article supplement (doi:10.7554/elife.77340), 2022-10-12
Supplement: fig3-figsupp2-data1 [file Figure 3—figure supplement 2P.xls]

## Sheet: Sheet1
	M	N	O
#1	0.699955	0.252525	0.314321
#2	0.840852	0.283118	0.460002
#3	0.919496	0.296607	0.459748
#4	0.920616	0.360438	0.579113
#5	1.323	0.28719	0.711306
#6	1.18378	0.299304	0.380035
#7	0.807104	0.272326	0.409049
#8	1.00863	0.424931	0.582524
#9	1.1257	0.464329	0.439082
#10	0.953091	0.438522	0.38426
#11	0.852407	0.460664	0.402432
#12	1.0355	0.412002	0.427527
#13	0.885239	0.455879	0.508919
#14	0.868899	0.449058	0.294265
#15	1.44867	0.357384	0.509327
#16	1.26823	0.373011	0.466874
#17	0.648595	0.32277	0.792342
#18	1.18454	0.425287	0.749025
#19	1.12066	0.333918	0.799316
#20	0.90504	0.356366	0.762157
