# Supplementary material for: Tumor elimination by clustered microRNAs miR-306 and miR-79 via noncanonical activation of JNK signaling
Source: eLife journal article supplement (doi:10.7554/elife.77340), 2022-10-12
Supplement: fig3-figsupp3-data1 [file Figure 3—figure supplement 3D.xls]

## Sheet: Sheet1
	column 1	column 2	column 3	column 4	column 5	column 6
#1	0.857226	0.640406	0.391301	0.51037	0.336939	0.624864
#2	0.751584	0.647092	0.346884	0.452535	0.415321	0.56221
#3	0.792304	0.527221	0.286352	0.54608	0.46348	0.512359
#4	0.804234	0.479473	0.285765	0.588196	0.345399	0.594086
#5	0.83741	0.478574	0.443877	0.589484	0.406401	0.521034
#6	0.764643	0.50648	0.443453	0.515422	0.477412	0.51992
#7	0.848291	0.556364	0.378739	0.564936	0.525999	0.661965
#8	0.939667	0.557761	0.506659	0.603103	0.37794	0.688771
#9	0.925253	0.554101	0.358268	0.558905	0.37853	0.566886
#10	0.931798	0.627133	0.512778	0.708505	0.416532	0.500824
#11	0.644798	0.532892	0.333431	0.502004	0.316969
#12	0.753376	0.521254	0.320426	0.610856	0.377223
#13	0.635923		0.316993	0.715446	0.273823
#14	0.918197		0.426089	0.543393	0.470643
#15	0.879482		0.355657		0.356454
#16	0.725796		0.293665		0.373252
#17	0.918059		0.496374		0.326429
#18	0.837056		0.33141		0.621552
#19	0.865495		0.282969		0.459294
#20	0.814195		0.146984		0.297513
#21	0.843555		0.405248		0.355202
#22					0.340041
