# Supplementary material for: Tumor elimination by clustered microRNAs miR-306 and miR-79 via noncanonical activation of JNK signaling
Source: eLife journal article supplement (doi:10.7554/elife.77340), 2022-10-12
Supplement: fig3-figsupp3-data1 [file Figure 3—figure supplement 3K.xls]

## Sheet: Sheet1
	E	F	G	H	I	J
#1	0.306225	0.113196	0.127555	0.640292	0.399288	0.420355
#2	0.288958	0.114794	0.0919098	0.582793	0.382648	0.508738
#3	0.307514	0.141655	0.151396	0.490322	0.499875	0.49015
#4	0.350446	0.111534	0.13676	0.465722	0.397581	0.549392
#5	0.284943	0.108713	0.124345	0.539944	0.406367	0.425782
#6	0.270618	0.107491	0.106872	0.630961	0.41684	0.520139
#7	0.280934	0.0902024	0.121852	0.513871	0.531939	0.518521
#8	0.28875	0.131486	0.175343	0.57727	0.620034	0.563613
#9	0.346087	0.140225	0.168949	0.476172	0.63634	0.429521
#10	0.276164	0.132818	0.150553	0.432794	0.463958	0.382533
#11	0.288773	0.105003	0.150617		0.534961	0.434213
#12	0.311759	0.143446	0.229597		0.558841	0.466521
#13		0.145927			0.508514	0.425141
#14		0.174873			0.485722
#15		0.144622
