# Supplementary material for: Tumor elimination by clustered microRNAs miR-306 and miR-79 via noncanonical activation of JNK signaling
Source: eLife journal article supplement (doi:10.7554/elife.77340), 2022-10-12
Supplement: fig4-data1 [file Figure F.xls]

## Sheet: Sheet1
	A	B	C	D	E
#1	0.245573	0.572576	0.348514	0.530081	0.425406
#2	0.377657	0.722432	0.282644	0.417325	0.339293
#3	0.252473	0.494665	0.370769	0.280401	0.324397
#4	0.313414	0.647284	0.363958	0.327746	0.335703
#5	0.306484	0.594165	0.323327	0.337377	0.382696
#6	0.297637	0.621192	0.216229	0.326698	0.308316
#7	0.398253	0.591661	0.344541	0.30667	0.409221
#8	0.334615	0.638057	0.485371	0.266071	0.328416
#9	0.343269	0.702181	0.300098	0.246581	0.422259
#10	0.375946	0.662846	0.480077	0.289283	0.278055
#11	0.38783	0.668993	0.312169	0.522552	0.160439
#12	0.341885	0.710439	0.361589	0.452597	0.345434
#13	0.340893	0.627422	0.331755	0.515873	0.232501
#14	0.390449	0.657076	0.409186	0.568855	0.275987
#15	0.284524	0.572533	0.417333
#16		0.769118	0.475459
#17		0.665964
#18		0.514116
#19		0.650476
#20		0.571734
#21		0.656015
#22		0.745735
#23		0.595392
