# Supplementary material for: Tumor elimination by clustered microRNAs miR-306 and miR-79 via noncanonical activation of JNK signaling
Source: eLife journal article supplement (doi:10.7554/elife.77340), 2022-10-12
Supplement: fig4-data1 [file Figure L.xls]

## Sheet: Sheet1
	G	H	I	J	K
#1	0.369015	0.120871	0.121149	0.0791666	0.069709
#2	0.347982	0.214916	0.10796	0.0921476	0.0573667
#3	0.379087	0.116323	0.0425191	0.0699584	0.0492191
#4	0.362695	0.203744	0.0451897	0.0717657	0.0883005
#5	0.305879	0.141758	0.0717893	0.0671292	0.0664084
#6	0.332883	0.196634	0.0839198	0.0839394	0.0625346
#7	0.312729	0.12933	0.0726305	0.0852303	0.0593841
#8	0.322731	0.136571	0.0576588	0.0581229	0.0714656
#9	0.319762	0.166992	0.0529599	0.0421214	0.0368558
#10	0.327106	0.175667	0.0789717	0.0547559	0.0417778
#11	0.322284	0.12835		0.0596866	0.0656579
#12	0.342254	0.170206			0.0612187
#13	0.356019
#14	0.302863
#15	0.394388
#16	0.353498
#17	0.331094
#18	0.371785
#19	0.344486
#20	0.381728
#21	0.362959
#22	0.36048
#23	0.395017
