# Supplementary material for: Tumor elimination by clustered microRNAs miR-306 and miR-79 via noncanonical activation of JNK signaling
Source: eLife journal article supplement (doi:10.7554/elife.77340), 2022-10-12
Supplement: fig4-data1 [file Figure Q.xls]

## Sheet: Sheet1
	M	N	O	P
severe folded eye	0.65	0.15	0.15	0
mild folded eye	0.25	0.25	0.35	0.1
