# Supplementary material for: Tumor elimination by clustered microRNAs miR-306 and miR-79 via noncanonical activation of JNK signaling
Source: eLife journal article supplement (doi:10.7554/elife.77340), 2022-10-12
Supplement: fig4-data2 [file Genotypes for Figure 4 and Figure 4—figure supplements.xls]

## Sheet: Sheet1
	Genotype
Figure 4A	Tub-Gal80, FRT19A/FRT19A; +/eyFLP5, Act>y+>Gal4, UAS-GFP; UAS-Luc/+
Figure 4B	Tub-Gal80, FRT19A/FRT19A; UAS-PVR[act]/eyFLP5, Act>y+>Gal4, UAS-GFP; UAS-Luc/+
Figure 4C	Tub-Gal80, FRT19A/FRT19A; UAS-PVR[act]/eyFLP5, Act>y+>Gal4, UAS-GFP; UAS-miR-9c,306,79,9b/+
Figure 4D	Tub-Gal80, FRT19A/FRT19A; UAS-PVR[act]/eyFLP5, Act>y+>Gal4, UAS-GFP; UAS-miR-306/+
Figure 4E	Tub-Gal80, FRT19A/FRT19A; UAS-PVR[act]/eyFLP5, Act>y+>Gal4, UAS-GFP; UAS-miR-79/+
Figure 4G	Tub-Gal80, FRT40A/FRT40A; UAS-Luc/eyFLP6, Act>y+>Gal4, UAS-GFP
Figure 4H	Tub-Gal80, FRT40A/UAS-Src64B, FRT40A; UAS-Luc/eyFLP6, Act>y+>Gal4, UAS-GFP
Figure 4I	Tub-Gal80, FRT40A/UAS-Src64B, FRT40A; UAS-miR-9c,306,79,9b/eyFLP6, Act>y+>Gal4, UAS-GFP
Figure 4J	Tub-Gal80, FRT40A/UAS-Src64B, FRT40A; UAS-miR-306/eyFLP6, Act>y+>Gal4, UAS-GFP
Figure 4K	Tub-Gal80, FRT40A/UAS-Src64B, FRT40A; UAS-miR-79/eyFLP6, Act>y+>Gal4, UAS-GFP
Figure 4M	Tub-Gal80, FRT40A/UAS-Src64B, FRT40A; UAS-Luc/eyFLP6, Act>y+>Gal4, UAS-GFP
Figure 4N	Tub-Gal80, FRT40A/UAS-Src64B, FRT40A; UAS-miR-9c,306,79,9b/eyFLP6, Act>y+>Gal4, UAS-GFP
Figure 4O	Tub-Gal80, FRT40A/UAS-Src64B, FRT40A; UAS-miR-306/eyFLP6, Act>y+>Gal4, UAS-GFP
Figure 4P	Tub-Gal80, FRT40A/UAS-Src64B, FRT40A; UAS-miR-79/eyFLP6, Act>y+>Gal4, UAS-GFP
Figure 4-figure suppplement 1A	Tub-Gal80, FRT40A/Hel25E[ccp-8], FRT40A; UAS-Luc/eyFLP6, Act>y+>Gal4, UAS-GFP
Figure 4-figure suppplement 1B	Tub-Gal80, FRT40A/Hel25E[ccp-8], FRT40A; UAS-miR-9c,306,79,9b/eyFLP6, Act>y+>Gal4, UAS-GFP
Figure 4-figure suppplement 1C	Tub-Gal80, FRT40A/Hel25E[ccp-8], FRT40A; UAS-miR-306/eyFLP6, Act>y+>Gal4, UAS-GFP
Figure 4-figure suppplement 1D	Tub-Gal80, FRT40A/Hel25E[ccp-8], FRT40A; UAS-miR-79/eyFLP6, Act>y+>Gal4, UAS-GFP
Figure 4-figure suppplement 1F	FRT42D, Tub-Gal80/FRT42D, Mahj[1]; UAS-Luc/eyFLP6, Act>y+>Gal4, UAS-GFP
Figure 4-figure suppplement 1G	FRT42D, Tub-Gal80/FRT42D, Mahj[1]; UAS-miR-9c,306,79,9b/eyFLP6, Act>y+>Gal4, UAS-GFP
Figure 4-figure suppplement 1H	FRT42D, Tub-Gal80/FRT42D, Mahj[1]; UAS-miR-306/eyFLP6, Act>y+>Gal4, UAS-GFP
Figure 4-figure suppplement 1I	FRT42D, Tub-Gal80/FRT42D, Mahj[1]; UAS-miR-79/eyFLP6, Act>y+>Gal4, UAS-GFP
Figure 4-figure suppplement 2A	Tub-Gal80, FRT19A/dlg[m52], FRT19A; UAS-Ras[v12]/eyFLP5, Act>y+>Gal4, UAS-GFP; UAS-Luc/+
Figure 4-figure suppplement 2B	Tub-Gal80, FRT19A/dlg[m52], FRT19A; UAS-Ras[v12]/eyFLP5, Act>y+>Gal4, UAS-GFP; UAS-miR-306/+
Figure 4-figure suppplement 2C	Tub-Gal80, FRT19A/dlg[m52], FRT19A; UAS-Ras[v12]/eyFLP5, Act>y+>Gal4, UAS-GFP; UAS-miR-79/+
Figure 4-figure suppplement 2D	Tub-Gal80, FRT19A/FRT19A; UAS-PVR[act]/eyFLP5, Act>y+>Gal4, UAS-GFP; UAS-Luc/+
Figure 4-figure suppplement 2E	Tub-Gal80, FRT19A/FRT19A; UAS-PVR[act]/eyFLP5, Act>y+>Gal4, UAS-GFP; UAS-miR-306/+
Figure 4-figure suppplement 2F	Tub-Gal80, FRT19A/FRT19A; UAS-PVR[act]/eyFLP5, Act>y+>Gal4, UAS-GFP; UAS-miR-79/+
Figure 4-figure suppplement 2G	Tub-Gal80, FRT40A/UAS-Src64B, FRT40A; UAS-Luc/eyFLP6, Act>y+>Gal4, UAS-GFP
Figure 4-figure suppplement 2H	Tub-Gal80, FRT40A/UAS-Src64B, FRT40A; UAS-miR-306/eyFLP6, Act>y+>Gal4, UAS-GFP
Figure 4-figure suppplement 2I	Tub-Gal80, FRT40A/UAS-Src64B, FRT40A; UAS-miR-79/eyFLP6, Act>y+>Gal4, UAS-GFP
Figure 4-figure suppplement 2J	Tub-Gal80, FRT40A/Hel25E[ccp-8], FRT40A; UAS-Luc/eyFLP6, Act>y+>Gal4, UAS-GFP
Figure 4-figure suppplement 2K	Tub-Gal80, FRT40A/Hel25E[ccp-8], FRT40A; UAS-miR-306/eyFLP6, Act>y+>Gal4, UAS-GFP
Figure 4-figure suppplement 2L	Tub-Gal80, FRT40A/Hel25E[ccp-8], FRT40A; UAS-miR-79/eyFLP6, Act>y+>Gal4, UAS-GFP
Figure 4-figure suppplement 2M	FRT42D, Tub-Gal80/FRT42D, Mahj[1]; UAS-Luc/eyFLP6, Act>y+>Gal4, UAS-GFP
Figure 4-figure suppplement 2N	FRT42D, Tub-Gal80/FRT42D, Mahj[1]; UAS-miR-306/eyFLP6, Act>y+>Gal4, UAS-GFP
Figure 4-figure suppplement 2O	FRT42D, Tub-Gal80/FRT42D, Mahj[1]; UAS-miR-79/eyFLP6, Act>y+>Gal4, UAS-GFP
Figure 4-figure suppplement 3A	pnr-Gal4/+; UAS-Luc/+
Figure 4-figure suppplement 3B	pnr-Gal4/+; UAS-miR-306/+
Figure 4-figure suppplement 3C	pnr-Gal4/+; UAS-miR-79/+
