# Supplementary material for: Tumor elimination by clustered microRNAs miR-306 and miR-79 via noncanonical activation of JNK signaling
Source: eLife journal article supplement (doi:10.7554/elife.77340), 2022-10-12
Supplement: fig4-figsupp1-data1 [file Figure 4—figure supplement 1E.xls]

## Sheet: Sheet1
	A	B	C	D
#1	0.205223	0.0973025	0.0990541	0.129204
#2	0.201057	0.118505	0.064427	0.0867277
#3	0.173834	0.0992493	0.0958836	0.105515
#4	0.226468	0.10584	0.0486526	0.1059
#5	0.182728	0.151257	0.0795809	0.0853363
#6	0.202571	0.12249	0.0694169	0.105783
#7	0.149833	0.155953	0.0505322	0.0879549
#8	0.128923	0.148792	0.100466	0.109312
#9	0.150769	0.122011	0.0844349	0.13571
#10	0.14026	0.138993	0.0939778	0.141846
#11	0.178933	0.151801	0.0895795	0.0939081
#12	0.14882	0.121437	0.103206	0.0897953
#13	0.17613	0.118215	0.0797498	0.115568
#14	0.148353	0.125293	0.0841425	0.112825
#15	0.141082	0.135432	0.11754	0.136857
#16	0.180873	0.147116	0.144417	0.0832999
#17	0.205944	0.15383	0.14073	0.12592
#18	0.15911	0.103995		0.0959143
#19	0.166273	0.118601		0.121828
#20	0.175383	0.137383
#21	0.200589	0.12217
#22	0.168872	0.0903835
#23	0.16757	0.119115
#24	0.221384
#25	0.19888
#26	0.203702
#27	0.234689
#28	0.224527
#29	0.217831
