# Supplementary material for: Tumor elimination by clustered microRNAs miR-306 and miR-79 via noncanonical activation of JNK signaling
Source: eLife journal article supplement (doi:10.7554/elife.77340), 2022-10-12
Supplement: fig4-figsupp1-data1 [file Figure 4—figure supplement 1J.xls]

## Sheet: Sheet1
	F	G	H	I
#1	0.105675	0.0534761	0.0491699	0.0635084
#2	0.123663	0.0504582	0.043785	0.0461589
#3	0.0969664	0.0506969	0.0470455	0.0433651
#4	0.168368	0.025378	0.0413507	0.0616439
#5	0.144872	0.0306362	0.0573555	0.0357624
#6	0.0795484	0.0460332	0.0545918	0.0594368
#7	0.109666	0.0721592	0.0752348	0.053119
#8	0.130185	0.0855147	0.0553574	0.0578057
#9	0.0861751	0.0370717	0.0597297	0.053968
#10	0.0829657	0.0511458	0.0585471	0.0911803
#11	0.104253	0.0289982	0.0676471	0.0933874
#12		0.0367423	0.0430739	0.0571513
#13		0.0390591	0.0644779	0.0804824
#14		0.0518872	0.0390428
#15		0.0429115	0.0332213
#16			0.0764393
#17			0.0786465
