# Supplementary material for: Tumor elimination by clustered microRNAs miR-306 and miR-79 via noncanonical activation of JNK signaling
Source: eLife journal article supplement (doi:10.7554/elife.77340), 2022-10-12
Supplement: fig4-figsupp2-data1 [file Figure 4—figure supplement 2P.xls]

## Sheet: Sheet1
	A	B	C	D	E	F	G	H	I	J	K	L	M	N	O
#1	0.141743	0.163324	0.362467	0.268332	0.643789	0.279092	0.23078	0.788613	0.788235	0.0681032	0.203824	0.17607	0.147542	0.214621	0.273995
#2	0.0872428	0.235168	0.148351	0.165539	0.696023	0.173645	0.0875226	0.832818	0.744206	0.0811193	0.282365	0.232952	0.149236	0.272	0.269617
#3	0.265292	0.145531	0.132169	0.157257	0.152249	0.163341	0.0757072	0.405316	0.825197	0.0373632	0.217764	0.191885	0.196862	0.181683	0.357687
#4	0.0311668	0.349577	0.118905	0.186635	0.523275	0.432575	0.353698	0.48984	0.804331	0.11417	0.158778	0.226451	0.0749878	0.112189	0.279994
#5	0.159808	0.302211	0.105294	0.191061	0.314923	0.410832	0.564442	0.372735	0.593042	0.166885	0.156366	0.332523	0.0946191	0.21104	0.243102
#6	0.0513166	0.181269	0.169938	0.134165	0.124192	0.446342	0.434166	0.287408	0.831833	0.126617	0.121295	0.159175	0.18133	0.120062	0.309944
#7	0.0687638	0.26685	0.382328	0.135012	0.726114	0.741959	0.505024	0.318698	0.261737	0.129757	0.1463	0.245583	0.238289	0.267064	0.231981
#8	0.365756	0.258575	0.294585	0.139893	0.122656	0.28284	0.312616	0.727811	0.284211	0.101314	0.22119	0.294924	0.126367	0.318715	0.210334
#9	0.0972981	0.202189	0.217286	0.189462	0.0818852	0.206253	0.282402	0.874146	0.650841	0.180392	0.164877	0.163756	0.0945235	0.423947	0.242099
#10	0.0523346	0.140269	0.390246	0.0736349	0.469138	0.195548	0.501492	0.789114	0.883879	0.137257	0.153772	0.2415	0.138622	0.458591	0.192479
#11	0.0728593	0.298158	0.553726	0.0966024	0.431357		0.831363	0.58013		0.148872	0.192574
#12	0.360633	0.325145	0.787278	0.106702	0.599604		0.484214	0.707407		0.145053	0.161372
#13	0.184976	0.23176	0.675097	0.114916	0.576874		0.409204	0.807024
#14	0.11913	0.310699	0.160353	0.339691	0.359985			0.752247
#15	0.130585	0.130611	0.114851	0.210465	0.600344
#16	0.0255868	0.120625	0.50085	0.190986	0.256942
#17	0.052476	0.434607		0.111964
#18		0.291509
#19		0.216506
