# Supplementary material for: Tumor elimination by clustered microRNAs miR-306 and miR-79 via noncanonical activation of JNK signaling
Source: eLife journal article supplement (doi:10.7554/elife.77340), 2022-10-12
Supplement: fig4-figsupp3-data1 [file Figure 4—figure supplement 3D.xls]

## Sheet: Sheet1
	A	B	C
	1.05238	0.503157	0.470846
	0.991037	0.525283	0.527566
	0.888661	0.46113	0.468271
	1.03781	0.520541	0.471315
	0.969496	0.546648	0.414771
	1.02423	0.463822	0.428526
	1.01	0.578373	0.547935
	0.950414	0.464056	0.4232
	0.966804	0.614079	0.478748
	0.979564	0.474417	0.510532
	0.988812	0.419746	0.430809
	1.06485	0.538102	0.380353
	1.03166	0.429112	0.459842
	0.984656	0.477636	0.42718
	1.05964
