# Supplementary material for: Tumor elimination by clustered microRNAs miR-306 and miR-79 via noncanonical activation of JNK signaling
Source: eLife journal article supplement (doi:10.7554/elife.77340), 2022-10-12
Supplement: fig5-data1 [file Figure 5E.xls]

## Sheet: Sheet1
CG8786 WT		RLU/FLU normalized to mock		CG8786 m1		RLU/FLU normalized to mock		CG8786 m2		RLU/FLU normalized to mock
Mock	#1	0.983296		Mock	#1	1.08582		Mock	#1	0.896469
	#2	0.950143			#2	1.05474			#2	0.971321
	#3	1.06656			#3	0.859445			#3	1.13221
miR-306	#1	0.42956		miR-306	#1	0.937475		miR-306	#1	0.36743
	#2	0.489682			#2	0.919996			#2	0.524405
	#3	0.588945			#3	0.762464			#3	0.482533
miR-79	#1	0.662589		miR-79	#1	0.585378		miR-79	#1	1.08147
	#2	0.580704			#2	0.430537			#2	0.876198
	#3	0.807357			#3	0.456691			#3	0.768994
