# Supplementary material for: Tumor elimination by clustered microRNAs miR-306 and miR-79 via noncanonical activation of JNK signaling
Source: eLife journal article supplement (doi:10.7554/elife.77340), 2022-10-12
Supplement: fig5-data1 [file Figure 5K.xls]

## Sheet: Sheet1
	H	I	J
#1	0.624504	0.645789	0.428461
#2	0.533753	0.663812	0.424423
#3	0.587374	0.584198	0.478808
#4	0.576388	0.502739	0.431285
#5	0.873221	0.658987	0.345175
#6	0.696913	0.535819	0.461881
#7	0.621813	0.662716	0.418951
#8	0.491075	0.736512	0.368241
#9	0.332409	0.629742	0.325828
#10	0.639434	0.844987	0.559259
#11	0.612048	0.770786	0.401432
#12	0.786665	0.646956	0.347425
#13	0.649066	0.658748	0.572582
#14	0.70388	0.618133	0.448541
#15	0.542479	0.751462	0.304576
#16	0.756806	0.738578	0.341973
#17	0.636434	0.661489	0.691655
#18	0.647481	0.768587	0.383693
#19	0.743531	0.626186	0.540253
#20	0.738861	0.693348	0.399095
#21	0.743146	0.781523	0.528858
#22		0.602824	0.398018
#23		0.645982	0.481432
#24		0.675661	0.441253
#25		0.632468
#26		0.671621
#27		0.74771
#28		0.573405
