# Supplementary material for: Tumor elimination by clustered microRNAs miR-306 and miR-79 via noncanonical activation of JNK signaling
Source: eLife journal article supplement (doi:10.7554/elife.77340), 2022-10-12
Supplement: fig5-data1 [file Figure 5N.xls]

## Sheet: Sheet1
	L	M
#1	0.598732	0.751082
#2	0.622677	0.829608
#3	0.635722	0.806846
#4	0.737445	0.820353
#5	0.596625	0.626681
#6	0.565491	0.693714
#7	0.724369	0.684823
#8	0.663227	0.915969
#9	0.647332	0.654264
#10	0.429683	0.560549
#11	0.89795	0.647399
#12	0.58401	0.420424
#13	0.599985
#14	0.753273
#15	0.597909
#16	0.872038
#17	0.663189
