# Supplementary material for: Tumor elimination by clustered microRNAs miR-306 and miR-79 via noncanonical activation of JNK signaling
Source: eLife journal article supplement (doi:10.7554/elife.77340), 2022-10-12
Supplement: fig5-data1 [file Figure 5S.xls]

## Sheet: Sheet1
	O	P	Q	R
#1	0.0302511	0.28652	0.0698704	0.711106
#2	0.300641	0.209598	0.04932	0.608779
#3	0.300577	0.369755	0.178821	0.216767
#4	0.238326	0.389564	0.193676	0.236422
#5	0.162652	0.369454	0.273472	0.370297
#6	0.102137	0.493041	0.238215	0.316516
#7	0.112426	0.368892	0.127268	0.265221
#8	0.2548	0.360799	0.236332	0.203275
#9	0.351099	0.250663	0.236342	0.306145
#10	0.259813	0.314972	0.179537	0.247337
#11		0.613707		0.349143
#12		0.47554
#13		0.304161
#14		0.461818
