# Supplementary material for: Tumor elimination by clustered microRNAs miR-306 and miR-79 via noncanonical activation of JNK signaling
Source: eLife journal article supplement (doi:10.7554/elife.77340), 2022-10-12
Supplement: fig5-data2 [file Genotypes for Figure 5 and Figure 5—figure supplements.xls]

## Sheet: Sheet1
	Genotype
Figure 5B	en-Gal4, UAS-GFP/+; UAS-Luc RNAi/puc-lacZ
Figure 5C	en-Gal4, UAS-GFP/+; UAS-RNF146 RNAi/puc-lacZ
Figure 5F	GMR-Gal4, UAS-GFP/+; UAS-Luc/+
Figure 5F	GMR-Gal4, UAS-GFP/+; UAS-miR-306/+
Figure 5F	GMR-Gal4, UAS-GFP/+; UAS-miR-79/+
Figure 5H	Tub-Gal80, FRT19A/dlg[m52], FRT19A; UAS-Ras[v12]/eyFLP5, Act>y+>Gal4, UAS-GFP; +/+
Figure 5I	Tub-Gal80, FRT19A/dlg[m52], FRT19A; UAS-Ras[v12]/eyFLP5, Act>y+>Gal4, UAS-GFP; UAS-Luc RNAi/+
Figure 5J	Tub-Gal80, FRT19A/dlg[m52], FRT19A; UAS-Ras[v12]/eyFLP5, Act>y+>Gal4, UAS-GFP; UAS-RNF146 RNAi/+
Figure 5L	Tub-Gal80, FRT19A/dlg[m52], FRT19A; UAS-Ras[v12]/UAS-RFP; eyFLP6, Act>y+>Gal4, UAS-GFP/+
Figure 5M	Tub-Gal80, FRT19A/dlg[m52], FRT19A; UAS-Ras[v12]/UAS-RNF146; eyFLP6, Act>y+>Gal4, UAS-GFP/+
Figure 5O	Tub-Gal80, FRT19A/dlg[m52], FRT19A; UAS-Ras[v12]/UAS-RFP; eyFLP6, Act>y+>Gal4, UAS-GFP/UAS-miR-306
Figure 5P	Tub-Gal80, FRT19A/dlg[m52], FRT19A; UAS-Ras[v12]/UAS-RNF146; eyFLP6, Act>y+>Gal4, UAS-GFP/UAS-miR-306
Figure 5Q	Tub-Gal80, FRT19A/dlg[m52], FRT19A; UAS-Ras[v12]/UAS-RFP; eyFLP6, Act>y+>Gal4, UAS-GFP/UAS-miR-79
Figure 5R	Tub-Gal80, FRT19A/dlg[m52], FRT19A; UAS-Ras[v12]/UAS-RNF146; eyFLP6, Act>y+>Gal4, UAS-GFP/UAS-miR-79
Figure 5-figure suppplement 1A	en-Gal4, UAS-GFP/+; UAS-Luc/+
Figure 5-figure suppplement 1B	en-Gal4, UAS-GFP/+; UAS-miR-306/+
Figure 5-figure suppplement 1C	en-Gal4, UAS-GFP/+; UAS-miR-79/+
Figure 5-figure suppplement 1D	en-Gal4, UAS-GFP/+; UAS-Luc/puc-lacZ
Figure 5-figure suppplement 1E	en-Gal4, UAS-GFP/+; UAS-miR-306/puc-lacZ
Figure 5-figure suppplement 1F	en-Gal4, UAS-GFP/+; UAS-miR-79/puc-lacZ
Figure 5-figure suppplement 2A	en-Gal4, UAS-GFP/+; UAS-aop RNAi/puc-lacZ
Figure 5-figure suppplement 2B	en-Gal4, UAS-GFP/+; UAS-atf3 RNAi/puc-lacZ
Figure 5-figure suppplement 2C	en-Gal4, UAS-GFP/+; UAS-bcd RNAi/puc-lacZ
Figure 5-figure suppplement 2D	en-Gal4, UAS-GFP/+; UAS-CG1358 RNAi/puc-lacZ
Figure 5-figure suppplement 2E	en-Gal4, UAS-GFP/+; UAS-chinmo RNAi/puc-lacZ
Figure 5-figure suppplement 2F	en-Gal4, UAS-GFP/+; UAS-chn RNAi/puc-lacZ
Figure 5-figure suppplement 2G	en-Gal4, UAS-GFP/+; UAS-mei-P26 RNAi/puc-lacZ
Figure 5-figure suppplement 2H	en-Gal4, UAS-GFP/+; UAS-pde1c RNAi/puc-lacZ
Figure 5-figure suppplement 3A	GMR-Gal4, UAS-GFP/+; UAS-Luc/UAS-Luc
Figure 5-figure suppplement 3A	GMR-Gal4, UAS-GFP/+; UAS-miR-306-sponge/UAS-miR-79-sponge
Figure 5-figure suppplement 4A	Tub-Gal80, FRT19A/FRT19A; +/eyFLP5, Act>y+>Gal4, UAS-GFP; UAS-Luc RNAi/+
Figure 5-figure suppplement 4B	Tub-Gal80, FRT19A/FRT19A; +/eyFLP5, Act>y+>Gal4, UAS-GFP; UAS-RNF146 RNAi/+
Figure 5-figure suppplement 4D	Tub-Gal80, FRT19A/dlg[m52], FRT19A; +/eyFLP5, Act>y+>Gal4, UAS-GFP; UAS-Luc RNAi/+
Figure 5-figure suppplement 4E	Tub-Gal80, FRT19A/dlg[m52], FRT19A; +/eyFLP5, Act>y+>Gal4, UAS-GFP; UAS-RNF146 RNAi/+
Figure 5-figure suppplement 4G	GMR-Gal4, UAS-GFP/+; +/+
Figure 5-figure suppplement 4H	GMR-Gal4, UAS-GFP/+; UAS-Luc/+
Figure 5-figure suppplement 4I	GMR-Gal4, UAS-GFP/+; UAS-miR-306/+
Figure 5-figure suppplement 4J	GMR-Gal4, UAS-GFP/+; UAS-miR-79/+
Figure 5-figure suppplement 4K	GMR-Gal4, UAS-GFP/+; UAS-Luc/UAS-Luc
Figure 5-figure suppplement 4L	GMR-Gal4, UAS-GFP/+; UAS-miR-306/UAS-miR-306
Figure 5-figure suppplement 4M	GMR-Gal4, UAS-GFP/+; UAS-miR-79/UAS-miR-79
Figure 5-figure suppplement 4O	GMR-Gal4, UAS-GFP/+; UAS-miR-306/UAS-miR-306
Figure 5-figure suppplement 4P	GMR-Gal4, UAS-GFP/UAS-RNF146; UAS-miR-306/UAS-miR-306
Figure 5-figure suppplement 4Q	GMR-Gal4, UAS-GFP/+; UAS-miR-79/UAS-miR-79
Figure 5-figure suppplement 4R	GMR-Gal4, UAS-GFP/UAS-RNF146; UAS-miR-79/UAS-miR-79
Figure 5-figure suppplement 4T	GMR-Gal4, UAS-GFP/+; UAS-Luc RNAi/+
Figure 5-figure suppplement 4U	GMR-Gal4, UAS-GFP/+; UAS-RNF146 RNAi/+
Figure 5-figure suppplement 4V	GMR-Gal4, UAS-GFP/UAS-Eiger[regg1]; UAS-Luc RNAi/+
Figure 5-figure suppplement 4W	GMR-Gal4, UAS-GFP/UAS-Eiger[regg1]; UAS-RNF146 RNAi/+
Figure 5-figure suppplement 4Y	Tub-Gal80, FRT19A/dlg[m52], FRT19A; +/+; eyFLP6, Act>y+>Gal4, UAS-GFP/UAS-miR-306
Figure 5-figure suppplement 4Z	Tub-Gal80, FRT19A/dlg[m52], FRT19A; +/UAS-RNF146; eyFLP6, Act>y+>Gal4, UAS-GFP/UAS-miR-306
Figure 5-figure suppplement 4AA	Tub-Gal80, FRT19A/dlg[m52], FRT19A; +/+; eyFLP6, Act>y+>Gal4, UAS-GFP/UAS-miR-79
Figure 5-figure suppplement 4AB	Tub-Gal80, FRT19A/dlg[m52], FRT19A; +/UAS-RNF146; eyFLP6, Act>y+>Gal4, UAS-GFP/UAS-miR-79
Figure 5-figure suppplement 5A	Tub-Gal80, FRT19A/dlg[m52], FRT19A; UAS-Ras[v12]/eyFLP5, Act>y+>Gal4, UAS-GFP; UAS-Luc RNAi/+
Figure 5-figure suppplement 5B	Tub-Gal80, FRT19A/dlg[m52], FRT19A; UAS-Ras[v12]/eyFLP5, Act>y+>Gal4, UAS-GFP; UAS-RNF146 RNAi/+
