# Supplementary material for: Tumor elimination by clustered microRNAs miR-306 and miR-79 via noncanonical activation of JNK signaling
Source: eLife journal article supplement (doi:10.7554/elife.77340), 2022-10-12
Supplement: fig5-figsupp4-data1 [file Figure 5—figure supplement 4AC.xls]

## Sheet: Sheet1
	Y	Z	AA	AB
#1	0.03345	0.0904752	0.0259816	0.0642347
#2	0.0574441	0.0984979	0.0272316	0.087577
#3	0.0439232	0.061022	0.0257436	0.0759301
#4	0.0508426	0.0391642	0.0494203	0.0682933
#5	0.0441466	0.0476861	0.054467	0.067794
#6	0.0454283	0.0509389	0.0432089	0.109814
#7	0.0487019	0.0832816	0.0402521	0.0993103
#8	0.0415829	0.0892404	0.0375011	0.0758603
#9	0.0491727	0.0818894	0.0372982	0.0566522
#10	0.0627368	0.0607338	0.0427516	0.0634687
#11	0.0311265	0.0555113	0.0474859	0.0562253
#12	0.0343609	0.0530127	0.0528816	0.0574374
#13	0.0512123	0.066526	0.047601	0.0416908
#14	0.030177	0.0446711		0.0538102
#15	0.0461973	0.0689792
#16		0.0815808
#17		0.0944681
