# Supplementary material for: Tumor elimination by clustered microRNAs miR-306 and miR-79 via noncanonical activation of JNK signaling
Source: eLife journal article supplement (doi:10.7554/elife.77340), 2022-10-12
Supplement: fig5-figsupp4-data1 [file Figure 5—figure supplement 4C.xls]

## Sheet: Sheet1
	A	B
#1	0.377714	0.28751
#2	0.373366	0.263947
#3	0.375203	0.403927
#4	0.376619	0.346135
#5	0.413255	0.350179
#6	0.398883	0.386991
#7	0.323943	0.29313
#8	0.405189	0.373725
#9	0.37094	0.376332
#10	0.391342	0.428591
#11	0.392171
#12	0.445218
#13	0.36012
#14	0.343574
