# Supplementary material for: Tumor elimination by clustered microRNAs miR-306 and miR-79 via noncanonical activation of JNK signaling
Source: eLife journal article supplement (doi:10.7554/elife.77340), 2022-10-12
Supplement: fig5-figsupp4-data1 [file Figure 5—figure supplement 4F.xls]

## Sheet: Sheet1
	D	E
#1	0.114217	0.05999
#2	0.0867308	0.0509821
#3	0.13952	0.0574236
#4	0.120743	0.0594402
#5	0.121952	0.0754968
#6	0.0997252	0.0675639
#7	0.13759	0.0897009
#8	0.118402	0.063469
#9	0.0992812	0.0595393
#10	0.0962942	0.0757302
#11	0.0764687	0.0878432
#12	0.125511	0.0943006
#13	0.134791	0.0558635
#14	0.12166	0.0570172
#15	0.0957785	0.0508231
#16	0.0945164	0.0487083
#17	0.108714	0.0465532
#18	0.0798109	0.0642199
#19	0.0817336
#20	0.0800078
#21	0.0655578
#22	0.0617901
#23	0.107151
#24	0.0944074
#25	0.0592037
