# Supplementary material for: Tumor elimination by clustered microRNAs miR-306 and miR-79 via noncanonical activation of JNK signaling
Source: eLife journal article supplement (doi:10.7554/elife.77340), 2022-10-12
Supplement: fig5-figsupp4-data1 [file Figure 5—figure supplement 4N.xls]

## Sheet: Sheet1
	G	H	I	J	K	L	M
#1	0.00071181	0.00110177	0.00121619	0.000853315	0.000191062	0.00101044	0.00119499
#2	0.000580261	0.000959329	0.000650233	0.00115923	0.000131285	0.000868402	0.00235916
#3	0.0016481	0.000822108	0.000735992	0.00129669	0.000349993	0.00211659	0.00198612
#4	0.00078045	0.00158157	0.000707428	0.000425242	0.000803969	0.00194513	0.00182284
#5	0.000878979	0.000382329	0.00111038	0.000420407	0.00116016	0.00248555	0.00126825
#6	0.00082668	0.00101833	0.00111449	0.000457296	0.000719501	0.00151816	0.00142607
#7	0.000308664	0.00112982	0.000771903	0.000802492	0.000480342	0.00211068	0.000753248
#8	0.000311899	0.000586304	0.000393897	0.000885914	0.000546467	0.00134629	0.00185812
#9	0.000562641	0.000390568	0.00153374	0.00115064	0.000815892	0.00163186	0.00123896
#10	0.000334225	0.000308737	0.00181338	0.00117206	0.000351461	0.00191792	0.00121658
#11	0.000304236	0.000926988	0.000345165	0.000224266	0.000782513	0.0011016	0.00173339
#12	0.00113259	0.000381671	0.0017707	0.000264021	0.000574564	0.00190149	0.00173858
#13	0.000597161	0.000456517	0.000649185	0.00126653	0.000780044	0.00119724	0.00135156
#14		0.000890042	0.000910412
