# Supplementary material for: Tumor elimination by clustered microRNAs miR-306 and miR-79 via noncanonical activation of JNK signaling
Source: eLife journal article supplement (doi:10.7554/elife.77340), 2022-10-12
Supplement: fig5-figsupp4-data1 [file Figure 5—figure supplement 4S.xls]

## Sheet: Sheet1
	O	P	Q	R
#1	1.01017	1.39986	1.03263	1.33236
#2	0.949935	1.38195	0.782877	1.16405
#3	1.00348	1.28875	0.877799	1.227
#4	0.859266	1.28566	0.799535	1.32587
#5	0.928071	1.20861	0.866138	1.30377
#6	0.95166	1.31909	0.879048	1.33435
#7	0.947347	1.28075	0.991015	1.1114
#8	0.93164	1.34827	1.08778	1.42978
#9	0.976142	1.48291	1.02766	1.21087
#10	1.02332	1.35146	1.00232	1.21995
#11	1.09959	1.26817	0.79772	0.99045
#12	1.02347	1.40191	0.882915	1.06818
#13	0.979949	1.00735	0.845642	1.10215
#14	1.14115	1.23827	0.772376	1.08528
#15	1.09198	1.37514	0.798137	1.12018
#16	1.04349	1.18901	0.805573	0.995893
#17	0.968199	1.36342	0.81539	1.30535
#18	1.00187	1.30362	0.851889	1.15712
#19	1.10712	1.18654	0.888597	1.37115
#20	0.962161	1.38611	0.922865	1.31404
