# Supplementary material for: Tumor elimination by clustered microRNAs miR-306 and miR-79 via noncanonical activation of JNK signaling
Source: eLife journal article supplement (doi:10.7554/elife.77340), 2022-10-12
Supplement: fig5-figsupp4-data1 [file Figure 5—figure supplement 4X.xls]

## Sheet: Sheet1
	T	U	V	W
#1	1.05386	0.986466	0.429688	0.244691
#2	1.04069	1.00723	0.345669	0.287974
#3	0.840796	0.940133	0.434633	0.222955
#4	0.940932	1.04938	0.468467	0.359662
#5	0.99423	0.993305	0.440756	0.210499
#6	0.915283	1.07581	0.464175	0.316842
#7	1.01127	0.914483	0.409025	0.30043
#8	0.901206	0.940406	0.417042	0.327279
#9	0.979712	1.02777	0.409193	0.227585
#10	0.881238	1.10573	0.43964	0.288436
#11	1.10697	0.88229	0.574937	0.371403
#12	1.06367	0.886077	0.477536	0.315875
#13	0.964899	0.874904	0.484859	0.278694
#14	1.04218	0.969359	0.501923	0.381671
#15	1.04321	0.994357	0.5746	0.289552
#16	1.06182	0.848329	0.526878	0.214034
#17	1.02811	0.862069	0.397978	0.393349
#18	1.08326	1.01426	0.470592	0.39013
#19	1.00726	0.960838	0.455274	0.343754
#20	1.03941	0.909012	0.300809	0.332119
