# Supplementary material for: Tumor elimination by clustered microRNAs miR-306 and miR-79 via noncanonical activation of JNK signaling
Source: eLife journal article supplement (doi:10.7554/elife.77340), 2022-10-12
Supplement: fig6-data3 [file Genotypes for Figure 6.xls]

## Sheet: Sheet1
	Genotype
Figure 6G	Tub-Gal80, FRT19A/FRT19A; +/eyFLP5, Act>y+>Gal4, UAS-GFP; UAS-Luc/+
Figure 6H	Tub-Gal80, FRT19A/FRT19A; +/eyFLP5, Act>y+>Gal4, UAS-GFP; UAS-Tnks/+
Figure 6I	Tub-Gal80, FRT19A/dlg[m52], FRT19A; UAS-Ras[v12]/eyFLP5, Act>y+>Gal4, UAS-GFP; UAS-Luc/+
Figure 6J	Tub-Gal80, FRT19A/dlg[m52], FRT19A; UAS-Ras[v12]/eyFLP5, Act>y+>Gal4, UAS-GFP; UAS-Tnks/+
Figure 6L	Tub-Gal80, FRT19A/dlg[m52], FRT19A; UAS-Ras[v12]/eyFLP5, Act>y+>Gal4, UAS-GFP; UAS-Tnks/+
Figure 6M	Tub-Gal80, FRT19A/dlg[m52], FRT19A; UAS-Ras[v12]/eyFLP5, Act>y+>Gal4, UAS-GFP; UAS-Luc/+
Figure 6M	Tub-Gal80, FRT19A/dlg[m52], FRT19A; UAS-Ras[v12]/eyFLP5, Act>y+>Gal4, UAS-GFP; UAS-Tnks/+
