# Supplementary material for: Tumor elimination by clustered microRNAs miR-306 and miR-79 via noncanonical activation of JNK signaling
Source: eLife journal article supplement (doi:10.7554/elife.77340), 2022-10-12
Supplement: fig6-figsupp1-data1 [file Figure 6—figure supplement 1B.xls]

## Sheet: Sheet1
	lane 1	lane 2	lane 3
#1	1	4.442	4.477
#2	1	4.76	3.045
#3	1	4.217	4.318
