# Supplementary figures and images for: Tumor elimination by clustered microRNAs miR-306 and miR-79 via noncanonical activation of JNK signaling
Source: eLife journal article supplement (doi:10.7554/elife.77340), 2022-10-12

#1

P-JNK

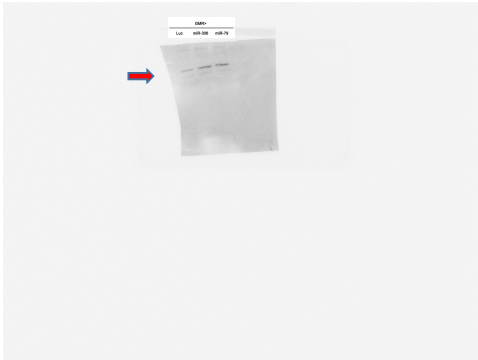

JNK

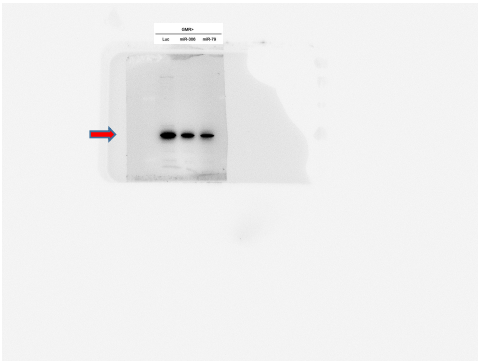

tubulin

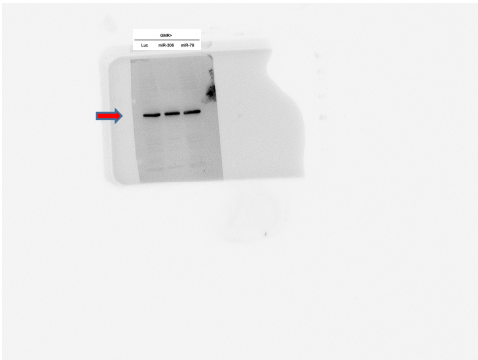

#2&#3

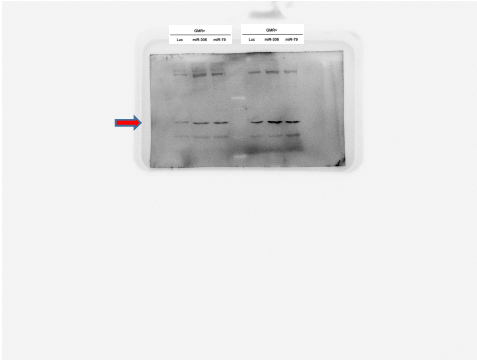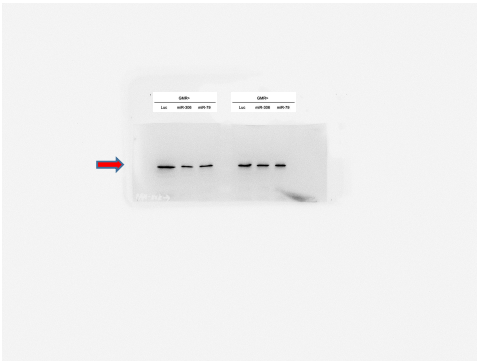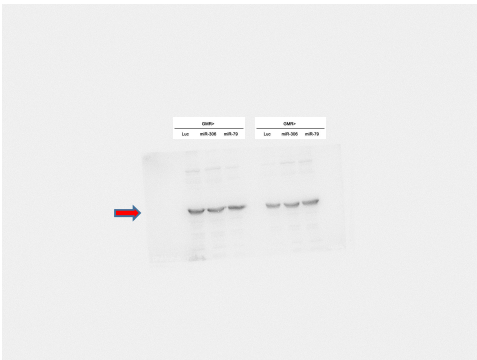

Supplement: fig3-figsupp2-data1 [file elife-77340-fig3-figsupp2-data1-v2.zip]

#1

RNF146

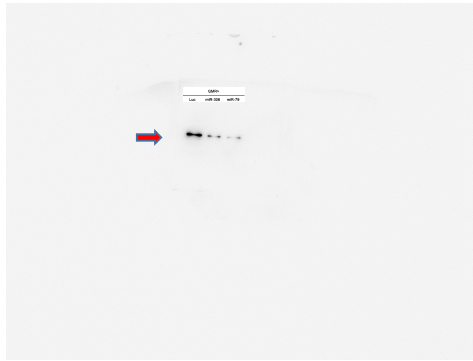

Tubulin

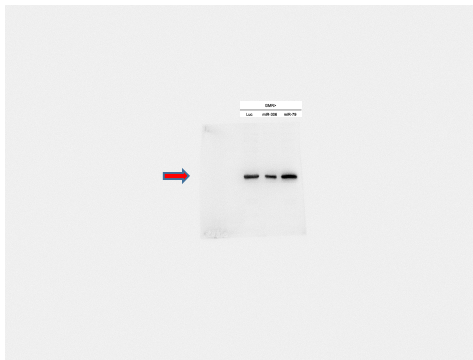

#2&#3

RNF146

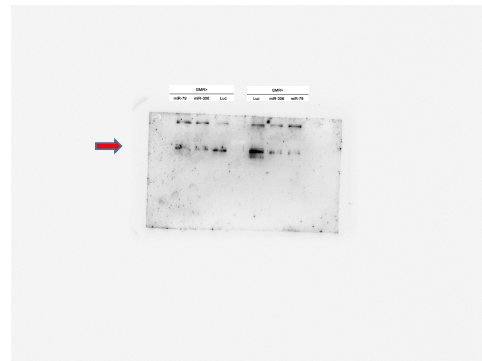

Tubulin

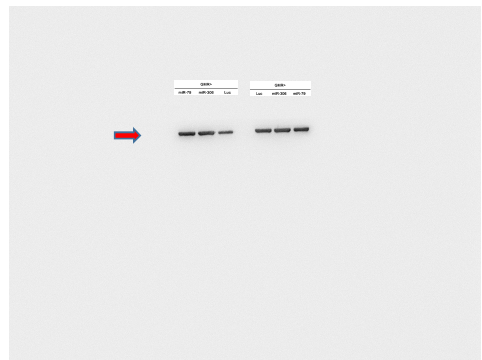

Supplement: fig5-data1 [file Figure 5F with label.pdf › Figure 5—source data 1/Figure 5F uncropped blots with label/Figure 5F with label.pdf]

#1

myc

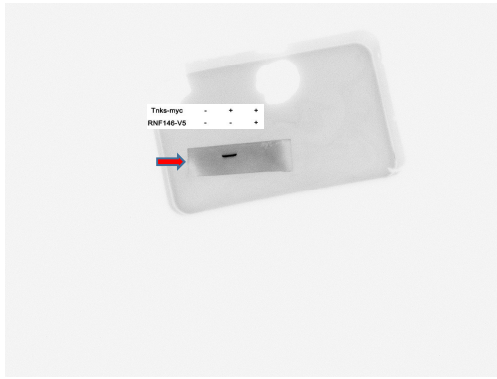

#2&#3

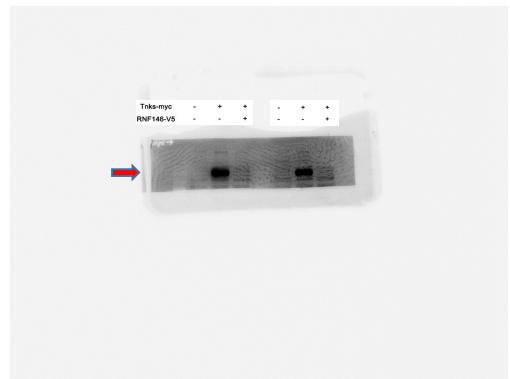

V5

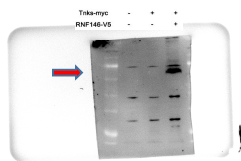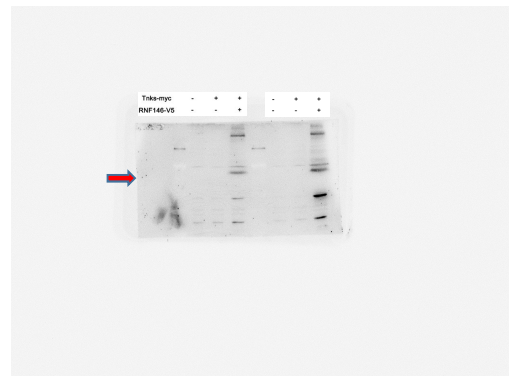

P-JNK

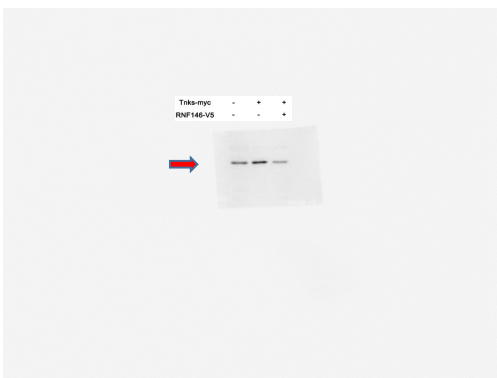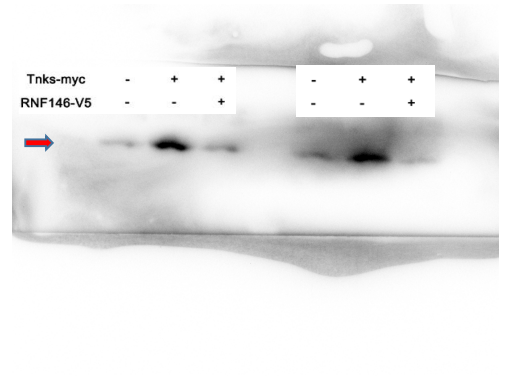

JNK

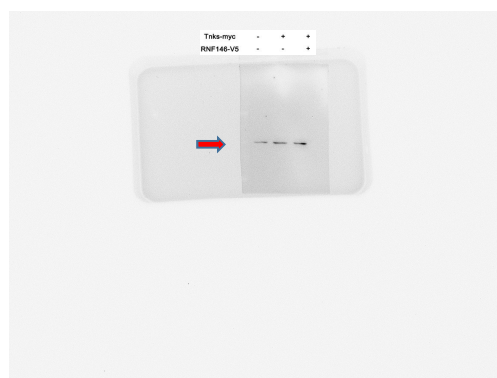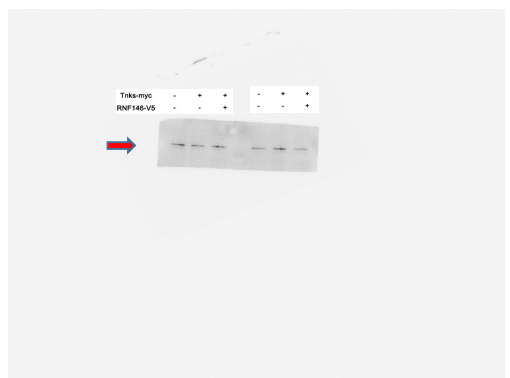

tubulin

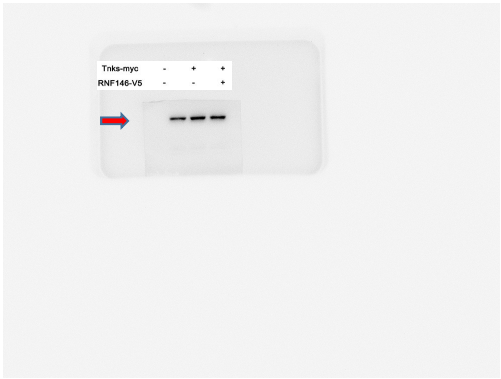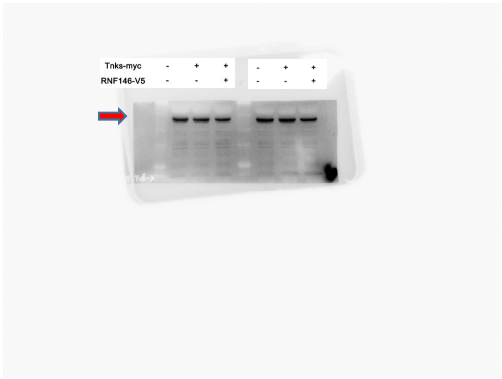

Supplement: fig6-data1 [file Figure 6A with label.pdf › Figure 6A uncropped blots with label/Figure 6A with label.pdf]

#1

myc

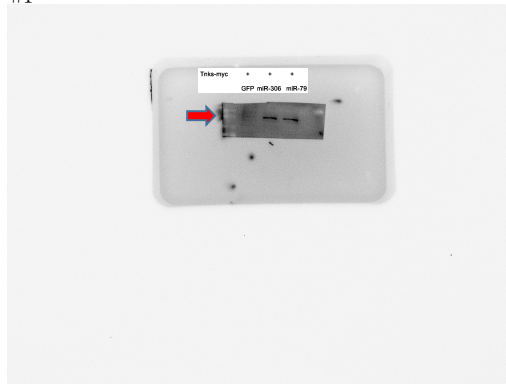

#2&#3

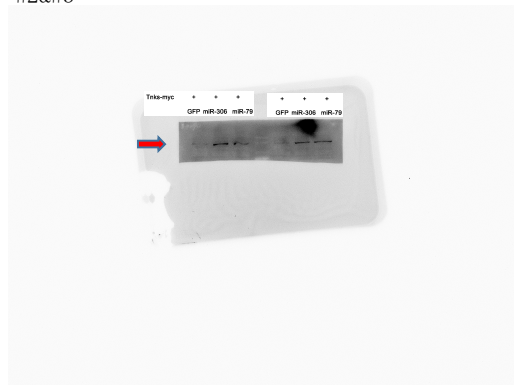

P-JNK

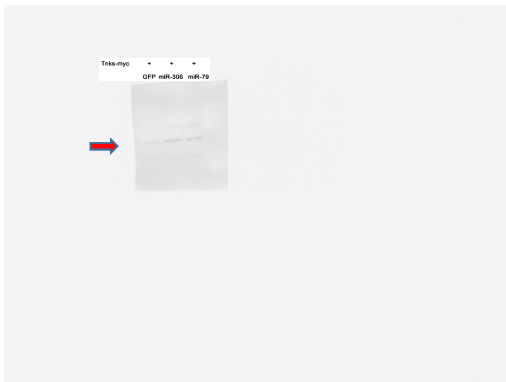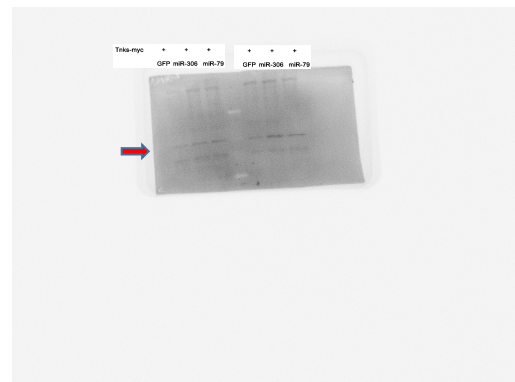

JNK

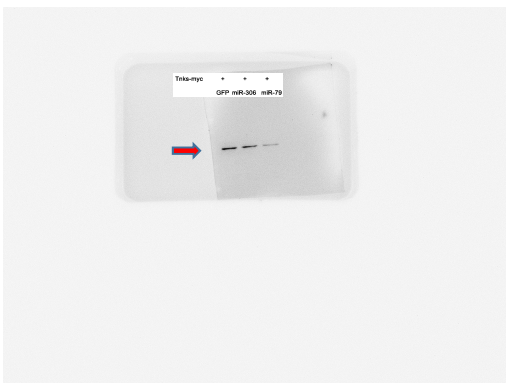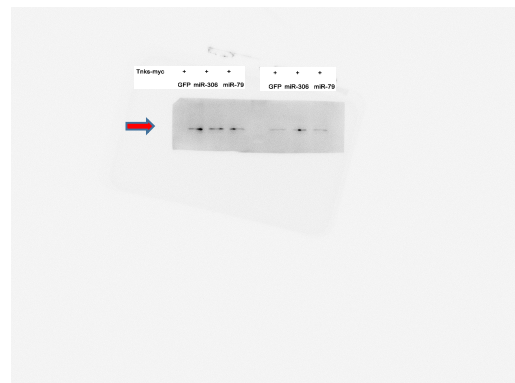

tubulin

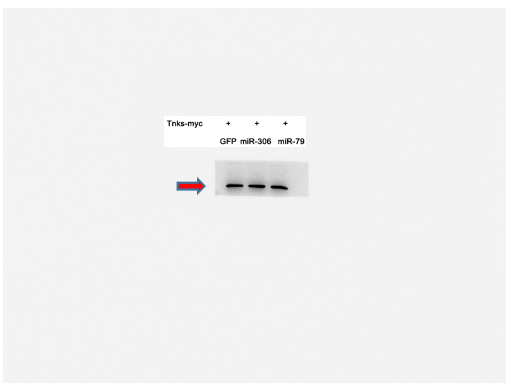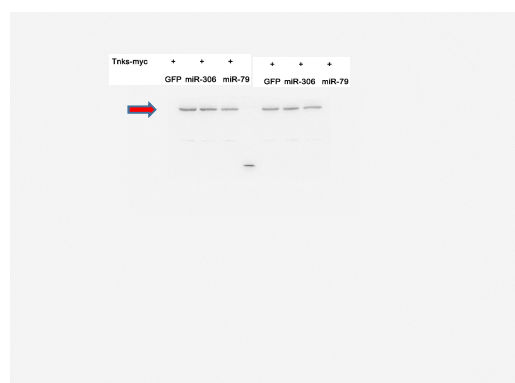

Supplement: fig6-figsupp1-data1 [file elife-77340-fig6-figsupp1-data1-v2.zip]
